# Supplementary material for: RNA editing by T7 RNA polymerase bypasses InDel mutations causing unexpected phenotypic changes
Source: PubMed Central journal article supplement — Nucleic Acids Res. 2015 Mar 30;43(8):3950–63. doi: 10.1093/nar/gkv269 (PMC4417176; doi:10.1093/nar/gkv269), 2015-03-30
Supplement: supp_gkv269_nar-00152-v-2015-File006.pdf [file supp_gkv269_nar-00152-v-2015-File006.pdf]

## **Supplementary Figures and Tables**

### **RNA editing by T7 RNA polymerase bypasses InDel mutations with high efficiency causing unexpected phenotypic changes**

Wons Ewa, Furmanek-Blaszk Beata and Sektas Marian\*

Department of Microbiology University of Gdansk, ul. Wita Stwosza 59, 80-308 Gdansk

\*To whom correspondence should be addressed: Tel: (+4858) 5236068; Fax: (+4858) 5236073; Email: marian.sektas@biol.ug.edu.pl

## Supplementary Figure S1

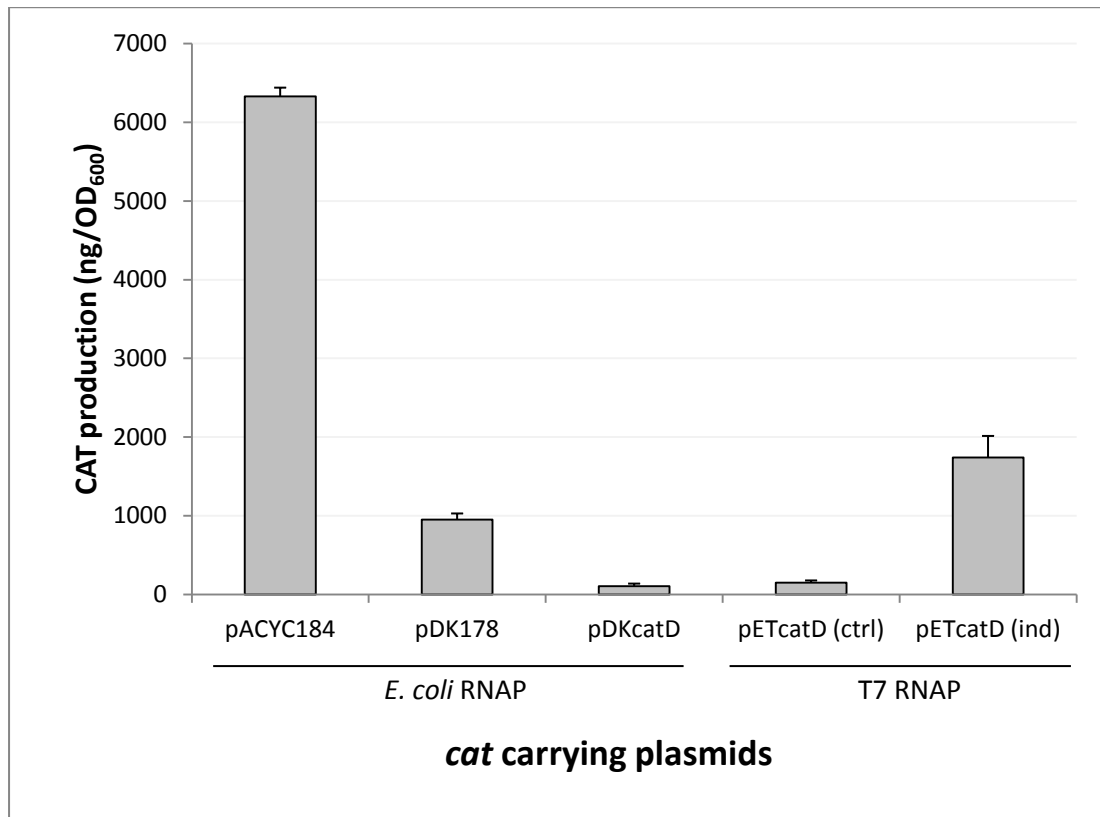

### Supplementary method

Chloramphenicol acetyltransferase (CAT) assay.

The CAT ELISA kit (Roche) was used to colorimetrically quantify CAT reporter levels based on the sandwich ELISA method. The recommended protocol was followed with some modifications. The cultures with appropriate plasmids were grown in M9 medium, induced with 1 mM IPTG at 3 h. Samples (1 ml each) were removed, pelleted and resuspended in 0.5 ml of lysis buffer (100 mM K/PO<sub>4</sub> pH 7.8, 1% Triton X-100, 5 mg/ml BSA, 1mM DTT, 5 mg/ml lysozyme) and kept for 20 min at room temperature. The centrifugally cleared cell extracts were diluted 1:25 and loaded onto microplate modules with anti-CAT antibodies prebound to the surface (Sunrise<sup>TM</sup> – Tecan). The CAT concentration was calculated as nanograms per milliliter of culture at OD<sub>600nm</sub>. Two separate experiments were performed on consecutive days.

Supplementary Figure S2

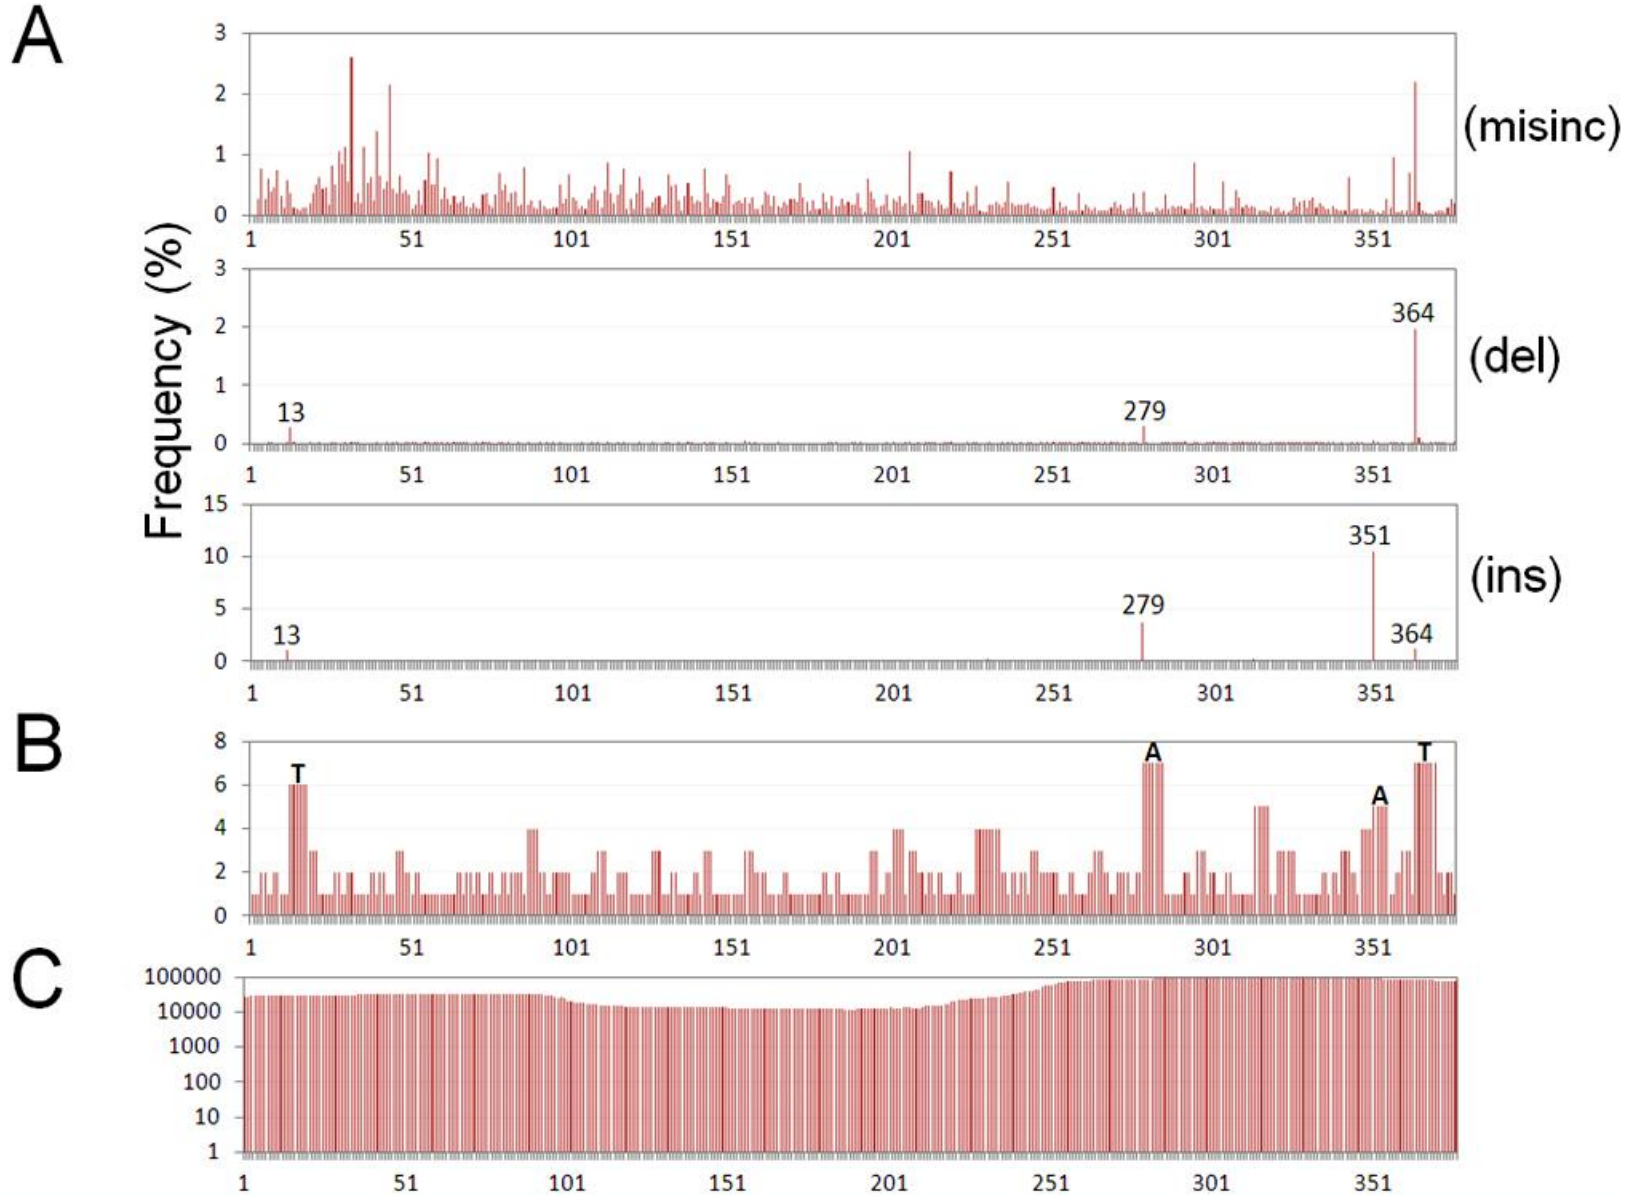

### Supplementary Figure S3

| mutants                    | WT   | delta |
|----------------------------|------|-------|
| (A <sub>5</sub> )mutLMR6   | 0,3  | 99,7  |
| (A <sub>5</sub> )mutL3     | 25,5 | 74,5  |
| (A <sub>5</sub> )mutL1     | 28,3 | 71,7  |
| (A <sub>5</sub> )mutR3     | 45,1 | 54,9  |
| (A <sub>5</sub> )mutR2     | 39,3 | 60,7  |
| (A <sub>5</sub> )mutM1     | 53,2 | 46,8  |
| (A <sub>5</sub> )ΔA356Δ377 | 0    | 100   |
| (A <sub>5</sub> )ΔA356     | 59,6 | 40,4  |
| (A <sub>6</sub> )WT        | 84,5 | 5,5   |

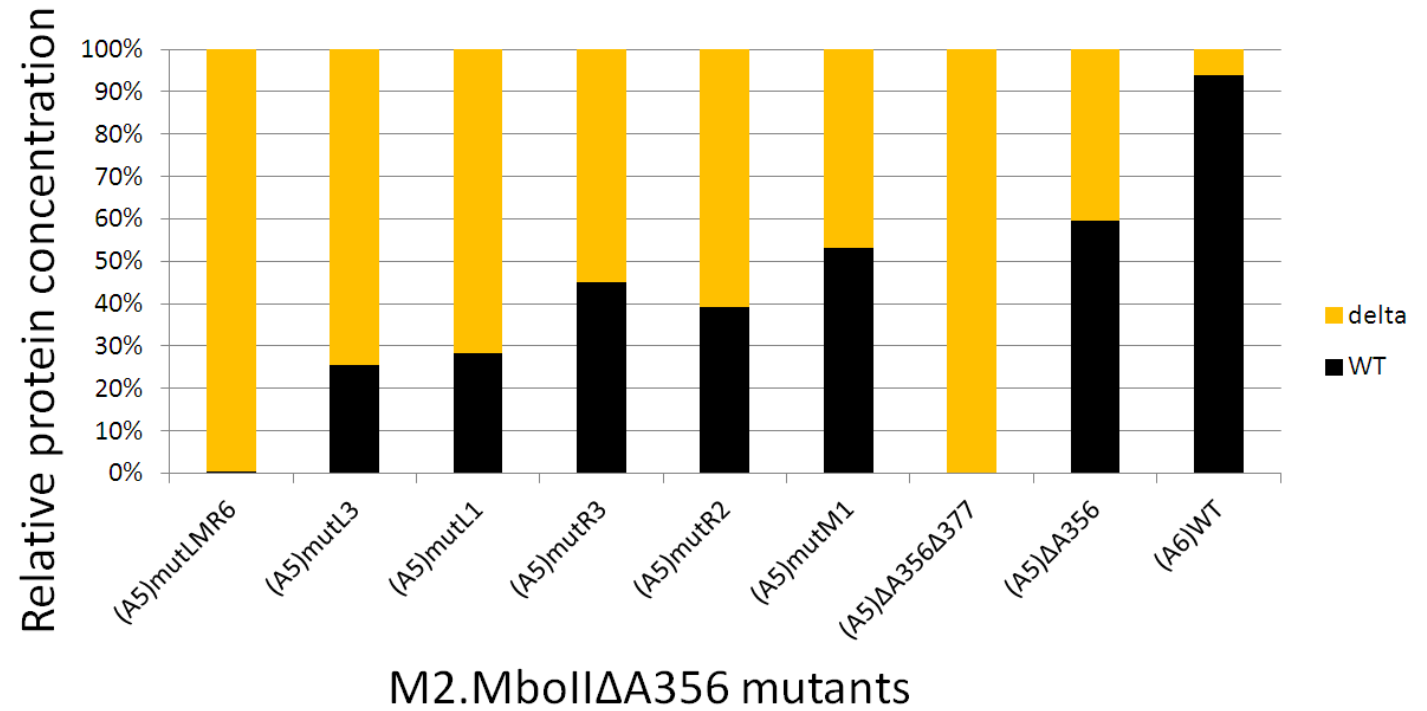

Supplementary Figure S4

A

**LFLMDTYLWNR**  
122-132

Protein sequence coverage: **80%**. Matched peptides shown in **bold red**.

1 **MNTIFFK**DSR NMQEVPNNSV HLIITSPPYF NIKDYAKDGY QLNSHSNKHS  
 51 **QQIGDIDS**YE YYLSEMLKVVW QECERVLKPN GKLVINTPLM PMLKKEMINTH  
 101 YTRHIFDLNS DIQQTILKNT **KLFLMDTYLW** **NR**TNSSKKLM FGSYPYPRNF  
 151 **YAQNTTE**FIT IYVKDGKPKD VSDEIKEKSK LSKQEWVEYT KQIWDIPIPS  
 201 **KNDLAF**GVHS AIMPEEIPRR LIKLYSFYDD TVLDPFAGSG TTLKVAKELG  
 251 **RRYIGY**ELME QYSEVICKKL ESI

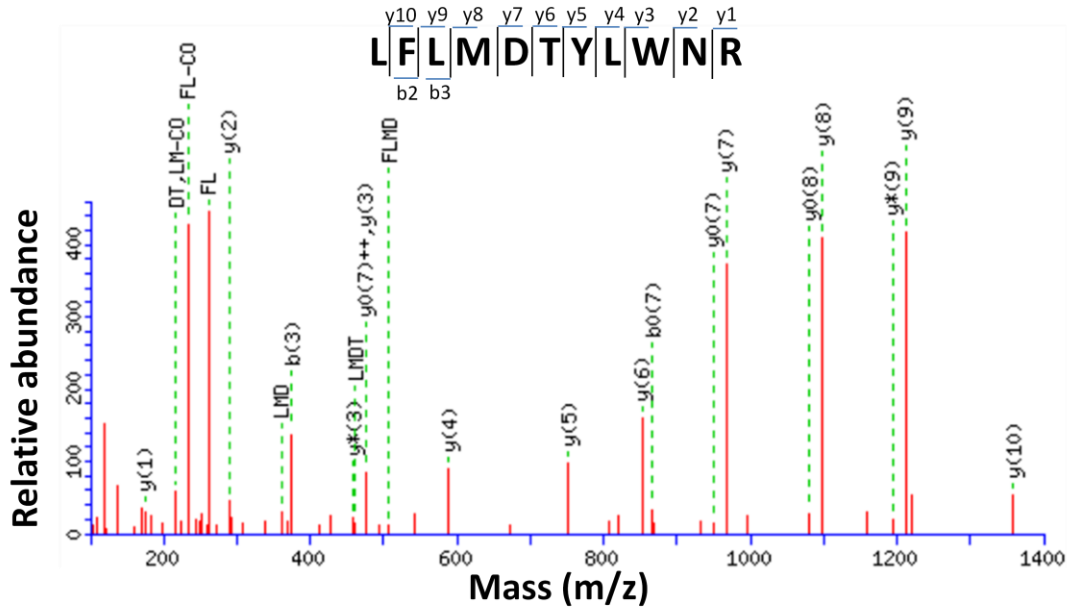

Monoisotopic mass of neutral peptide  $M_r(\text{calc})$  1470.7329  $M_r(\text{expt})$  1470.7373  
 Ions Score: 79 Expect: 1.4e-08  $\Delta m$ : 0.0043

| #  | a               | a <sup>++</sup> | b               | b <sup>++</sup> | b <sup>*</sup> | b <sup>++</sup> | b <sup>0</sup>  | b <sup>0++</sup> | Seq. | y                | y <sup>++</sup> | y <sup>*</sup>   | y <sup>*++</sup> | y <sup>0</sup>   | y <sup>0++</sup> | #  |
|----|-----------------|-----------------|-----------------|-----------------|----------------|-----------------|-----------------|------------------|------|------------------|-----------------|------------------|------------------|------------------|------------------|----|
| 1  | 86.0964         | 43.5519         | 114.0913        | 57.5493         |                |                 |                 |                  | L    |                  |                 |                  |                  |                  |                  | 11 |
| 2  | <b>233.1648</b> | 117.0861        | <b>261.1598</b> | 131.0835        |                |                 |                 |                  | F    | <b>1358.6562</b> | 679.8317        | 1341.6296        | 671.3184         | 1340.6456        | 670.8264         | 10 |
| 3  | 346.2489        | 173.6281        | <b>374.2438</b> | 187.6255        |                |                 |                 |                  | L    | <b>1211.5878</b> | 606.2975        | <b>1194.5612</b> | 597.7842         | 1193.5772        | 597.2922         | 9  |
| 4  | 477.2894        | 239.1483        | 505.2843        | 253.1458        |                |                 |                 |                  | M    | <b>1098.5037</b> | 549.7555        | 1081.4771        | 541.2422         | <b>1080.4931</b> | 540.7502         | 8  |
| 5  | 592.3163        | 296.6618        | 620.3112        | 310.6593        |                |                 | 602.3007        | 301.6540         | D    | <b>967.4632</b>  | 484.2352        | 950.4367         | 475.7220         | <b>949.4526</b>  | <b>475.2300</b>  | 7  |
| 6  | 693.3640        | 347.1856        | 721.3589        | 361.1831        |                |                 | 703.3484        | 352.1778         | T    | <b>852.4363</b>  | 426.7218        | 835.4097         | 418.2085         | 834.4257         | 417.7165         | 6  |
| 7  | 856.4273        | 428.7173        | 884.4223        | 442.7148        |                |                 | <b>866.4117</b> | 433.7095         | Y    | <b>751.3886</b>  | 376.1979        | 734.3620         | 367.6847         |                  |                  | 5  |
| 8  | 969.5114        | 485.2593        | 997.5063        | 499.2568        |                |                 | 979.4958        | 490.2515         | L    | <b>588.3253</b>  | 294.6663        | 571.2987         | 286.1530         |                  |                  | 4  |
| 9  | 1155.5907       | 578.2990        | 1183.5856       | 592.2965        |                |                 | 1165.5751       | 583.2912         | W    | <b>475.2412</b>  | 238.1242        | <b>458.2146</b>  | 229.6110         |                  |                  | 3  |
| 10 | 1269.6336       | 635.3205        | 1297.6286       | 649.3179        | 1280.6020      | 640.8046        | 1279.6180       | 640.3126         | N    | <b>289.1619</b>  | 145.0846        | 272.1353         | 136.5713         |                  |                  | 2  |
| 11 |                 |                 |                 |                 |                |                 |                 |                  | R    | <b>175.1190</b>  | 88.0631         | 158.0924         | 79.5498          |                  |                  | 1  |

| Seq   | ya              | yb              | Seq   | ya              | yb       | Seq   | ya       | yb              |
|-------|-----------------|-----------------|-------|-----------------|----------|-------|----------|-----------------|
| FL    | <b>233.1648</b> | <b>261.1598</b> | FLM   | 364.2053        | 392.2002 | FLMD  | 479.2323 | <b>507.2272</b> |
| FLMDT | 580.2799        | 608.2749        | LM    | <b>217.1369</b> | 245.1318 | LMD   | 332.1639 | <b>360.1588</b> |
| LMDT  | 433.2115        | <b>461.2064</b> | LMDTY | 596.2749        | 624.2698 | MD    | 219.0798 | 247.0747        |
| MDT   | 320.1275        | 348.1224        | MDTY  | 483.1908        | 511.1857 | MDTYL | 596.2749 | 624.2698        |
| DT    | 189.0870        | <b>217.0819</b> | DTY   | 352.1503        | 380.1452 | DTYL  | 465.2344 | 493.2293        |
| DTYLW | 651.3137        | 679.3086        | TY    | 237.1234        | 265.1183 | TYL   | 350.2074 | 378.2023        |
| TYLW  | 536.2867        | 564.2817        | TYLWN | 650.3297        | 678.3246 | YL    | 249.1598 | 277.1547        |
| YLW   | 435.2391        | 463.2340        | YLWN  | 549.2820        | 577.2769 | LW    | 272.1757 | 300.1707        |
| LWN   | 386.2187        | 414.2136        | WN    | 273.1346        | 301.1295 |       |          |                 |

# B

**TPNFFLMDTYLWNR**  
119-132

Protein sequence coverage: 82%. Matched peptides shown in **bold red**.  
 1 **MNTIFFKDSR** NMQEVNNSV HLIITSPYF NIKDYAKDGY QLNSHSNKHS  
 51 **QQIGDIDSYE** YLSEMLKVV QECERVLKPN GKLVIPTLM PMLKKEMNTH  
 101 **YTRHIFDLNS** DIQQTILK**TP NFFLMDTYLW NR**TNSSKLM FGSYPYPRNF  
 151 **YAQNTTEFIT** IYVKDGGPKD VSDEIKEKSK LSKQEWVEYT KQIWDIPIPS  
 201 **KNDLAFGVHS** AIMPEEIPRR LIKLYSFYDD TVLDPFAGSG TTLKVAKELG  
 251 **RRYIGYELME** QYSEVICKKL ESI

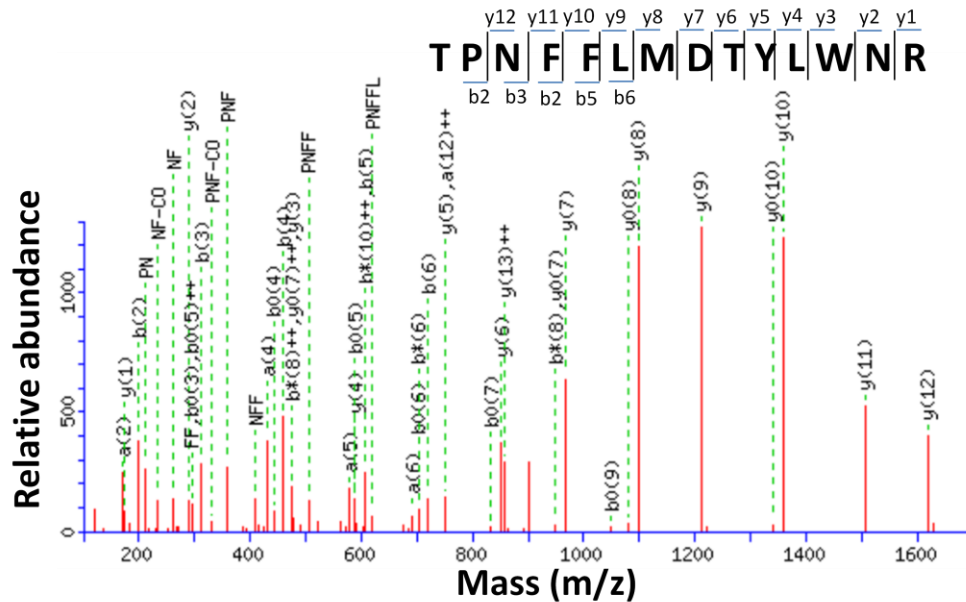

Monoisotopic mass of natural peptide  $M_r(\text{calc})$ : 1816.8607,  $M_r(\text{expt})$ : 1816.8690  
 Ions Score: 111 Expect: 8.4e-12  $\Delta m$ : 0.0084

| #  | a               | a <sup>++</sup> | b               | b <sup>++</sup> | b*              | b <sup>+++</sup> | b <sup>0</sup>   | b <sup>0++</sup> | Seq. | y                | y <sup>++</sup> | y*        | y <sup>+++</sup> | y <sup>0</sup>   | y <sup>0++</sup> | #  |
|----|-----------------|-----------------|-----------------|-----------------|-----------------|------------------|------------------|------------------|------|------------------|-----------------|-----------|------------------|------------------|------------------|----|
| 1  | 74.0600         | 37.5337         | 102.0550        | 51.5311         |                 |                  | 84.0444          | 42.5258          | T    |                  |                 |           |                  |                  |                  | 14 |
| 2  | <b>171.1128</b> | 86.0600         | <b>199.1077</b> | 100.0575        |                 |                  | 181.0972         | 91.0522          | P    | 1716.8203        | <b>858.9138</b> | 1699.7937 | 850.4005         | 1698.8097        | 849.9085         | 13 |
| 3  | 285.1557        | 143.0815        | <b>313.1506</b> | 157.0790        | 296.1241        | 148.5657         | <b>295.1401</b>  | 148.0737         | N    | <b>1619.7675</b> | 810.3874        | 1602.7410 | 801.8741         | 1601.7569        | 801.3821         | 12 |
| 4  | <b>432.2241</b> | 216.6157        | <b>460.2191</b> | 230.6132        | 443.1925        | 222.0999         | <b>442.2085</b>  | 221.6079         | F    | <b>1505.7246</b> | 753.3659        | 1488.6980 | 744.8527         | 1487.7140        | 744.3606         | 11 |
| 5  | <b>579.2926</b> | 290.1499        | <b>607.2875</b> | 304.1474        | 590.2609        | 295.6341         | <b>589.2769</b>  | <b>295.1421</b>  | F    | <b>1358.6562</b> | 679.8317        | 1341.6296 | 671.3184         | <b>1340.6456</b> | 670.8264         | 10 |
| 6  | <b>692.3766</b> | 346.6919        | <b>720.3715</b> | 360.6894        | <b>703.3450</b> | 352.1761         | <b>702.3610</b>  | 351.6841         | L    | <b>1211.5878</b> | 606.2975        | 1194.5612 | 597.7842         | 1193.5772        | 597.2922         | 9  |
| 7  | 823.4171        | 412.2122        | 851.4120        | 426.2096        | 834.3855        | 417.6964         | <b>833.4015</b>  | 417.2044         | M    | <b>1098.5037</b> | 549.7555        | 1081.4771 | 541.2422         | <b>1080.4931</b> | 540.7502         | 8  |
| 8  | 938.4441        | 469.7257        | 966.4390        | 483.7231        | <b>949.4124</b> | <b>475.2098</b>  | 948.4284         | 474.7178         | D    | <b>967.4632</b>  | 484.2352        | 950.4367  | 475.7220         | <b>949.4526</b>  | <b>475.2300</b>  | 7  |
| 9  | 1039.4917       | 520.2495        | 1067.4866       | 534.2470        | 1050.4601       | 525.7337         | <b>1049.4761</b> | 525.2417         | T    | <b>852.4363</b>  | 426.7218        | 835.4097  | 418.2085         | 834.4257         | 417.7165         | 6  |
| 10 | 1202.5551       | 601.7812        | 1230.5500       | 615.7786        | 1213.5234       | <b>607.2654</b>  | 1212.5394        | 606.7733         | Y    | <b>751.3886</b>  | 376.1979        | 734.3620  | 367.6847         |                  |                  | 5  |
| 11 | 1315.6391       | 658.3232        | 1343.6340       | 672.3207        | 1326.6075       | 663.8074         | 1325.6235        | 663.3154         | L    | <b>588.3253</b>  | 294.6663        | 571.2987  | 286.1530         |                  |                  | 4  |
| 12 | 1501.7184       | <b>751.3629</b> | 1529.7134       | 765.3603        | 1512.6868       | 756.8470         | 1511.7028        | 756.3550         | W    | <b>475.2412</b>  | 238.1242        | 458.2146  | 229.6110         |                  |                  | 3  |
| 13 | 1615.7614       | 808.3843        | 1643.7563       | 822.3818        | 1626.7297       | 813.8685         | 1625.7457        | 813.3765         | N    | <b>289.1619</b>  | 145.0846        | 272.1353  | 136.5713         |                  |                  | 2  |
| 14 |                 |                 |                 |                 |                 |                  |                  |                  | R    | <b>175.1190</b>  | 88.0631         | 158.0924  | 79.5498          |                  |                  | 1  |

| Seq   | ya       | yb              | Seq   | ya              | yb              | Seq   | ya       | yb              |
|-------|----------|-----------------|-------|-----------------|-----------------|-------|----------|-----------------|
| PN    | 184.1081 | <b>212.1030</b> | PNF   | <b>331.1765</b> | <b>359.1714</b> | PNFF  | 478.2449 | <b>506.2398</b> |
| PNFFL | 591.3289 | <b>619.3239</b> | NF    | <b>234.1237</b> | <b>262.1186</b> | NFF   | 381.1921 | 409.1870        |
| NFFL  | 494.2762 | 522.2711        | NFFLM | 625.3167        | 653.3116        | FF    | 267.1492 | <b>295.1441</b> |
| FFL   | 380.2333 | 408.2282        | FFLM  | 511.2737        | 539.2687        | FLMD  | 626.3007 | 654.2956        |
| FL    | 233.1648 | 261.1598        | FLM   | 364.2053        | 392.2002        | FLMD  | 479.2323 | 507.2272        |
| FLMDT | 580.2799 | 608.2749        | LM    | 217.1369        | 245.1318        | LMD   | 332.1639 | 360.1588        |
| LMDT  | 433.2115 | 461.2064        | LMDTY | 596.2749        | 624.2698        | MD    | 219.0798 | 247.0747        |
| MDT   | 320.1275 | 348.1224        | MDTY  | 483.1908        | 511.1857        | MDTYL | 596.2749 | 624.2698        |
| DT    | 189.0870 | 217.0819        | DTY   | 352.1503        | 380.1452        | DTYL  | 465.2344 | 493.2293        |
| DTYLW | 651.3137 | 679.3086        | TY    | 237.1234        | 265.1183        | TYL   | 350.2074 | 378.2023        |
| TYLW  | 536.2867 | 564.2817        | TYLWN | 650.3297        | 678.3246        | YL    | 249.1598 | 277.1547        |
| YLW   | 435.2391 | 463.2340        | YLWN  | 549.2820        | 577.2769        | LW    | 272.1757 | 300.1707        |
| LWN   | 386.2187 | 414.2136        | WN    | 273.1346        | 301.1295        |       |          |                 |

Supplementary Figure S5

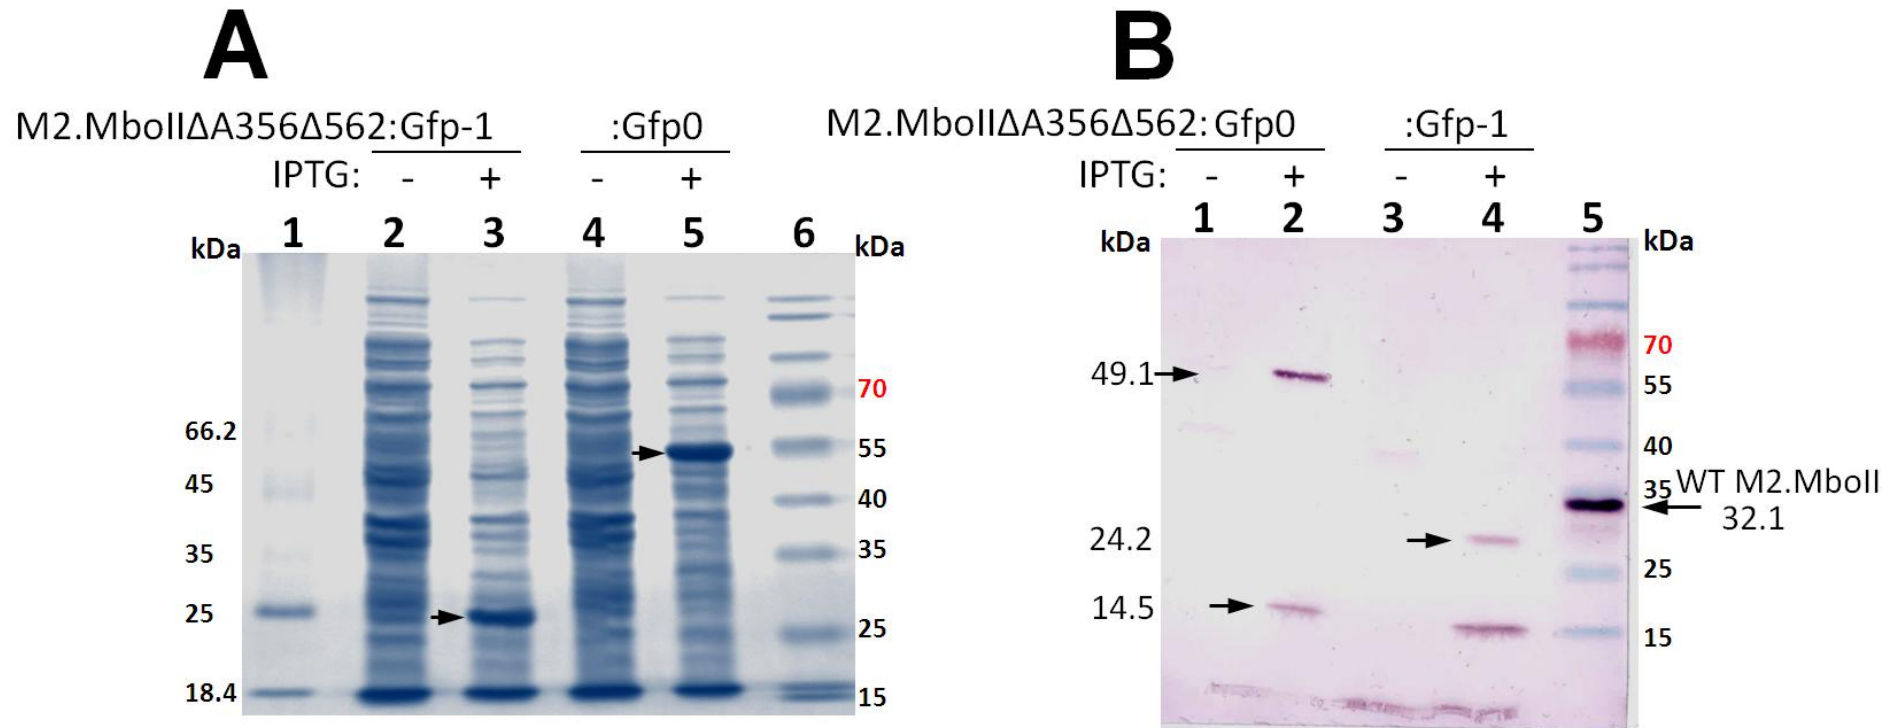

## SUPPLEMENTARY FIGURE LEGENDS

**Figure S1. Chloramphenicol acetyltransferase (CAT) production from frameshifting mutant *catΔG103*.** CAT levels of WT *cat* and *catΔG103* genes, determined via immunoassay as described in “Supplementary methods” section, are shown as nanograms of protein per OD<sub>600nm</sub> of culture. Expression from genes located on pACYC184, pDK178 and pDKcatD were constitutive while pETcatD ind was IPTG inducible. All plasmids confer chloramphenicol resistance. The mean values and standard deviations of two independent experiments are shown.

**Figure S2. T7 RNA polymerase-based transcriptional errors distribution within mRNA of *mboIIM2A356* gene (1-376 nt) analysed by NGS.** (A) Errors distribution and frequency of nucleotide misincorporations (misinc), deletions (del) and insertions (ins), respectively. Note: scale varies from chart to chart. (B) Nucleotide homopolymers distribution. (C) Sequencing depth. The bar charts show read numbers per base.

**Figure S3. Densitometric quantification of reciprocal proportion between full-length (WT) and short M2.MboIIA356 (delta) products in given site-specific mutants of *mboIIM2A356* gene (see Figure 1).** Yellow- fraction of short protein product (14.5 kDa) and its main degradation product. Black – fraction of full-length product (32 kDa).

**Figure S4. Heterologous mode of A356 nucleotide deletion restoration by identification of internal peptides of M2.MboIIA356 detected in LC-MS-MS/MS analysis.** (A) The ion spectrum of the mass-to-charge ( $m/z$ ) values of tryptic-digest derivative LFLMDTYLWNR [122-132] by MASCOT analysis. (B) The ion spectrum of the ( $m/z$ ) values of the tryptic-digest derivative TPNFFLMDTYLWNR [119-132]. Nomenclature for sequence ions in mass spectra of peptides according to (79). Masses of several matched ions of the most intense peaks are in bold red in tables containing all possible combinations of ion derivatives.

**Figure S5. Immunodetection of M2.MboIIA356Δ562-GFP hybrids.** (A) Protein lysates were resolved by 10%-SDS-PAGE and stained with Coomassie brilliant blue. Lane 1, Unstained protein molecular weight marker (Fermentas). Lane 2 and 3, non-induced and IPTG induced lysates of ER2566 cells bearing *mboIIM2A356Δ562gfp-1* gene. Lane 4 and 5, non-induced and IPTG induced lysates of ER2566 cells bearing *mboIIM2A356Δ562gfp0*



gene. Lane 6, PageRuler prestained protein ladder (Fermentas). **(B)** Western-blotting with anti-M2.MboII rabbit polyclonal antibody/anti-rabbit-AP after expression of single-nucleotide deletion fusion gene *mboIIM2ΔA356Δ562gfp0* (lane 1 and 2, non-induced and IPTG induced lysates, respectively) and double-nucleotide deletion fusion gene *mboIIM2ΔA356Δ562gfp-1* (lane 3 and 4, non-induced and IPTG induced lysates, respectively). Lane 5, PageRuler prestained protein ladder (Fermentas).

**Supplementary Table S1. Plasmids used in this study.**

| <b>Plasmid name<br/>(short)</b>              | <b>Relevant feature(s)</b>                                                                                                                                                                                               | <b>Reference</b> |
|----------------------------------------------|--------------------------------------------------------------------------------------------------------------------------------------------------------------------------------------------------------------------------|------------------|
| <b>pANTS</b>                                 | Integrative vector with $\lambda$ <i>attP</i> site, pBR322 ori, Amp <sup>R</sup>                                                                                                                                         | (80)             |
| <b>pANTSaraT7mboB<math>\Delta</math>A356</b> | pANTS derivative with <i>mboIIM2<math>\Delta</math>A356</i> gene under independent control of <i>P</i> <sub>araBAD</sub> and T7 phage promoters , excised from pBAD24/T7mboBA5 and cloned between ClaI and HindIII sites | This study       |
| <b>pBAD24</b>                                | arabinose inducible <i>araBAD</i> promoter, <i>araC</i> , pBR322 ori, Amp <sup>R</sup>                                                                                                                                   | (81)             |
| <b>pBAD24/T7mboBA5</b>                       | pBAD24 derivative carrying <i>mboIIM2<math>\Delta</math>A356</i> gene with T7 promoter cloned between XbaI-HindIII, excised from pETmboIIMB.4                                                                            | This study       |
| <b>pBR222</b>                                | pMB1 ori, Amp <sup>R</sup> Tc <sup>R</sup>                                                                                                                                                                               | (82)             |
| <b>pDK178</b>                                | pKK232-8 plasmid with <i>cat</i> gene under control of <i>pvuIIC</i> promoter                                                                                                                                            | (33)             |
| <b>pDKcatD</b>                               | pDK178 derivative with frameshifting G103 deletion mutation in the <i>cat</i> gene                                                                                                                                       | This study       |
| <b>pET24</b>                                 | IPTG inducible T7 promoter, pBR ori, Km <sup>R</sup>                                                                                                                                                                     | Novagene         |
| <b>pET24a</b>                                | Used for translational fusion with RBS and gene <i>10</i> of T7, IPTG inducible T7 promoter, pBR ori, Km <sup>R</sup>                                                                                                    | Novagene         |
| <b>pETcatD</b>                               | pET24 derivative with <i>cat<math>\Delta</math>G103</i>                                                                                                                                                                  | This study       |

|                                                                 |                                                                                                                                  |            |
|-----------------------------------------------------------------|----------------------------------------------------------------------------------------------------------------------------------|------------|
|                                                                 | gene of pDKcatD, cloned between SalI/XhoI, blunted by Klenow fragment                                                            |            |
| <b>pET24mboIIMB.3</b><br>[(A <sub>6</sub> )WT]                  | pET24a derivative with the wild type <i>mboIIM2</i> methyltransferase gene cloned between NdeI-BamHI sites                       | (30)       |
| <b>pET24mboIIMB.4</b><br>[(A <sub>5</sub> )ΔA356]               | pET24a derivative with frameshifting A356 deletion mutation in <i>mboIIM2</i>                                                    | This study |
| <b>pET24mbo(A<sub>5</sub>)ΔStopMet</b>                          | pET24mboIIMB.4 derivative with double codon replacement, 124 TAA stop to Tyr TAC (0 frame) and Lys 125 TAG to Leu CTC (-1 frame) | This study |
| <b>pET24mbo(A<sub>5</sub>)mutL1</b><br>[(A <sub>5</sub> )mutL1] | pET24mboIIMB.4 derivative with single codon replacement, Lys 118 AAA to synonymous AAG                                           | This study |
| <b>pET24mbo(A<sub>5</sub>)mutL3</b><br>[(A <sub>5</sub> )mutL3] | pET24mboIIMB.4 derivative with double codon replacement, Leu 117 TTA codon to synonymous CTG and Lys 118 AAA to synonymous AAG   | This study |
| <b>pET24mbo(A<sub>5</sub>)mutM1</b><br>[(A <sub>5</sub> )mutM1] | pET24mboIIMB.4 derivative with single codon replacement, Asn 121 AAC to Ser AGC                                                  | This study |
| <b>pET24mbo(A<sub>5</sub>)mutR2</b><br>[(A <sub>5</sub> )mutR2] | pET24mboIIMB.4 derivative with double codon replacement, Phe 122 TTT to synonymous TTC, and Phe 123 TTT to synonymous TTC        | This study |
| <b>pET24mbo(A<sub>5</sub>)mutR3</b><br>[(A <sub>5</sub> )mutR3] | pET24mboIIMB.4 derivative with triple codon replacement, Asn 121                                                                 | This study |

|                                                                |                                                                                                                                                                                                |            |
|----------------------------------------------------------------|------------------------------------------------------------------------------------------------------------------------------------------------------------------------------------------------|------------|
|                                                                | AAC to AGC Ser, Phe 122 TTT to TCT Ser and Phe 123 TTT to TCT Ser                                                                                                                              |            |
| <b>pET24mbo(A<sub>5</sub>)mutLMR6 [(A<sub>5</sub>)mutLMR6]</b> | pET24mboIIMB.4 derivative with six replacements, Leu 117 TTA to synonymous CTG, Lys 118 AAA to synonymous AAG, Asn 121 AAC to AGC Ser codon, Phe 122 TTT to TCT Ser and Phe 123 TTT to TCT Ser | This study |
| <b>pET24mboBΔG112 [ΔG112]</b>                                  | pET24mboIIMB.3 derivative with frameshifting G112 deletion mutation in <i>mboIIM2</i>                                                                                                          | This study |
| <b>pET24mboBΔT327 [ΔT327]</b>                                  | pET24mboIIMB.3 derivative with frameshifting T327 deletion mutation in <i>mboIIM2</i>                                                                                                          | This study |
| <b>pET24mboBΔT327ΔA328 [ΔT327ΔA328]</b>                        | pET24mboIIMB.3 derivative with frameshifting T327/A328 double deletion mutation in <i>mboIIM2</i>                                                                                              | This study |
| <b>pET24mboBΔA355ΔA356 [ΔA355ΔA356]</b>                        | pET24mboIIMB.4 derivative with frameshifting A355/A356 double deletion mutation in <i>mboIIM2</i>                                                                                              | This study |
| <b>pET24mboBΔG112ΔA356 [ΔG112ΔA356]</b>                        | pET24mboIIMB.4 derivative with frameshifting G112/A356 double deletion mutation in <i>mboIIM2</i>                                                                                              | This study |
| <b>pET24mboB+T372</b>                                          | pET24mboIIMB.3 derivative with frameshifting T372 insertion mutation in <i>mboIIM2</i>                                                                                                         | This study |
| <b>pET24mboBΔA356ΔT372 [ΔA356ΔT372]</b>                        | pET24mboIIMB.4 derivative with frameshifting A356/T372 double deletion mutation in <i>mboIIM2</i>                                                                                              | This study |
| <b>pET24mboBΔA356+T371</b>                                     | pET24mboIIMB.4 derivative with                                                                                                                                                                 | This study |

|                                                                                             |                                                                                                                                                                                    |            |
|---------------------------------------------------------------------------------------------|------------------------------------------------------------------------------------------------------------------------------------------------------------------------------------|------------|
| <b>[<math>\Delta</math>A356+T371]</b>                                                       | -1 frameshifting A356 deletion and wild-type 0-frame restoring insertion T371 in <i>mboIIM2</i>                                                                                    |            |
| <b>pET24mboB<math>\Delta</math>G630 [AG630]</b>                                             | pET24mboIIMB.3 derivative with frameshifting T273 insertion mutation in <i>mboIIM2</i>                                                                                             | This study |
| <b>pET24mboBC621G<math>\Delta</math>G630 [AC621<math>\Delta</math>G630]</b>                 | pET24mboB $\Delta$ G630 derivative with C621 altered to G621 in <i>mboIIM2</i>                                                                                                     | This study |
| <b>pET24mboBwt<math>\Delta</math>378</b>                                                    | pET24mboIIMB.3 derivative with proximal fragment of <i>mboIIM2</i> (378 nt) with BamHI sites on its distal terminus                                                                | This study |
| <b>pET24mboB<math>\Delta</math>A356<math>\Delta</math>377 [AA356<math>\Delta</math>377]</b> | pET24mboIIMB.4 derivative with proximal fragment of <i>mboIIM2<math>\Delta</math>A356</i> (377 nt) with BamHI sites on its distal terminus                                         | This study |
| <b>pETmboBwt<math>\Delta</math>378gfp0</b>                                                  | pET24mboB $\Delta$ 378 derivative with 378 nt proximal part of <i>mboIIM2wt<math>\Delta</math>378</i> and <i>gfp0</i> (both 0 frame)                                               | This study |
| <b>pETmboBwt<math>\Delta</math>378gfp-1</b>                                                 | pET24mboB $\Delta$ 378 derivative with 378 nt proximal part of <i>mboIIM2wt<math>\Delta</math>378</i> (0 frame) and <i>gfp-1</i> ( $\Delta$ A390, - 1 frameshift)                  | This study |
| <b>pETmboB<math>\Delta</math>A356<math>\Delta</math>377gfp0</b>                             | pET24mboB $\Delta$ A356 $\Delta$ 377 derivative with 377 nt proximal part of <i>mboIIM2<math>\Delta</math>A356<math>\Delta</math>377</i> (-1 frameshift) and <i>gfp0</i> (0 frame) | This study |

|                              |                                                                                                                                                                  |            |
|------------------------------|------------------------------------------------------------------------------------------------------------------------------------------------------------------|------------|
| <b>pETmboBΔA356Δ377gfp-1</b> | pET24mboBΔA356Δ377 derivative with 377 nt proximal part of <i>mboIIM2ΔA356Δ377</i> (-1 frameshift) and <i>gfp-1</i> (ΔA389, -1 frameshift)                       | This study |
| <b>pETmboBΔA356Δ562</b>      | pET24mboIIMB.4 derivative with proximal fragment of <i>mboIIM2ΔA356Δ562</i> (562 nt) with BamHI sites on its distal terminus                                     | This study |
| <b>pETmboBΔA356Δ562gfp0</b>  | pETmboBΔA356Δ562 derivative with 562 nt proximal part of <i>mboIIM2ΔA356Δ562</i> (-1 frameshift) and <i>gfp0</i> (0 frame)                                       | This study |
| <b>pETmboBΔA356Δ562gfp-1</b> | pETmboBΔA356Δ562 derivative with 562 nt proximal part of <i>mboIIM2ΔA356Δ562</i> (-1 frameshift) and <i>gfp-1</i> (ΔA574, -1 frameshift)                         | This study |
| <b>pETmboA5gfp0</b>          | pETmboBΔA356Δ377gfp0 derivative containing fusion fragment of <i>mboBΔA356Δ377</i> (from 349-377 nt) and <i>gfp0</i> inserted between NheI-EcoRI sites of pET24a | This study |
| <b>pETmboA5NoMetgfp0</b>     | pETmboA5gfp0 derivative with altered internal ATG codon to AGG, proximal to <i>gfp</i>                                                                           | This study |
| <b>pET24aNcuIBM</b>          | pET24a derivative with WT <i>ncuIM2</i> methyltransferase gene cloned between NdeI-BamHI sites                                                                   | (30)       |
| <b>pETncuBΔA357</b>          | pET24aNcuIBM derivative with                                                                                                                                     | This study |

|                                         |                                                                                                                |            |
|-----------------------------------------|----------------------------------------------------------------------------------------------------------------|------------|
|                                         | frameshifting A357deletion mutation in <i>ncuIM2</i>                                                           |            |
| <b>pGreenTIR</b>                        | IPTG inducible <i>lac</i> promoter with <i>gfp</i> from <i>Aequora victoria</i> , ori pUC, Amp <sup>R</sup>    | (35)       |
| <b>pINTtsCm</b>                         | pSC101 temperature-sensitive replicon contains $\lambda$ integrase gene under $P_R/cI$ control Cm <sup>R</sup> | (83)       |
| <b>pSC101</b>                           | pSC101 replicon, Tc <sup>R</sup>                                                                               | (84)       |
| <b>pT7-7</b>                            | pBR322 derivative with T7 promoter, Amp <sup>R</sup>                                                           | (3)        |
| <b>pT7-7.1M</b>                         | pT7-7 derivative carrying <i>mboIIM1</i>                                                                       | (32)       |
| <b>pT7-7mbo1<math>\Delta</math>A462</b> | pT7-7.1M derivative with frameshifting A462 deletion mutation in <i>mboIIM1</i>                                | This study |
| <b>pUC18</b>                            | pUC ori, Amp <sup>R</sup>                                                                                      | (85)       |

**Supplementary Table S2. List of oligonucleotides used in this study.**

| No | Name<br>( <u>forward</u> ,<br><u>reverse</u> ) | Sequence (5'-3')                    | Comment                                                                                                 |
|----|------------------------------------------------|-------------------------------------|---------------------------------------------------------------------------------------------------------|
| 1  | C1                                             | AATTCGGATGTTGCTAGCAGGAAGA           | 1 and 2 were used to create an oligoduplex with a specific MboII recognition site (underlined)          |
| 2  | C2                                             | AGCTTCTTCCTGCTAGCAACATCCG           |                                                                                                         |
| 3  | C3                                             | AATTCGGATGTTGCTAGCAGGAACA           | 3 and 4 were used to create an oligoduplex with no MboII recognition site                               |
| 4  | C4                                             | AGCTTGTTCCTGCTAGCAACATCCG           |                                                                                                         |
| 5  | BsaR (fwd)                                     | ATGGTTATCAGCTAAATAGCCATAGCAA        | 5 and 6 were used in PCR to delete G112 in <i>mboIIM2</i> (damage of BsaBI restriction site)            |
| 6  | BsaL (rev)                                     | TTTGGCATAGTCCTTAATATTAATAAGG<br>TG  |                                                                                                         |
| 7  | SwaR<br>(fwd)                                  | AGCGACATTCAACAAACCATTTTAAAAAAC      | 7 and 8 were used in PCR to delete T327 and/or A328 in <i>mboIIM2</i> (damage of SwaI restriction site) |
| 8  | SwaL (rev)                                     | TTTAAATCAAAAATATGTCTGGTATAATGG<br>G |                                                                                                         |
| 9  | KLFnew<br>(fwd)                                | ACACCAAGCTCTTCTTAATGGACACTT         | 9 and 10 were used in PCR to delete A355 and A356 in <i>mboIIM2</i>                                     |
| 10 | MboDL<br>(rev)                                 | TTTAAAATGGTTTGTGAATGTCGC            |                                                                                                         |
| 11 | FspR (fwd)                                     | GCGATTATGCCAGAAGAAATCCCA            | 11 and 12 were used in PCR to delete A630 in <i>mboIIM2</i>                                             |
| 12 | FspL (rev)                                     | GAATGCACGCCAAATGCCAAATCA            |                                                                                                         |
| 13 | NruR (fwd)                                     | GGGGTGCATTCGCGATTATGCCAG            | 13 and 14 were used in PCR to alter C621 to G in <i>mboIIM2ΔA630</i>                                    |
| 14 | NruL (rev)                                     | AAATGCCAAATCATTTTTACTGGG            |                                                                                                         |
| 15 | RT-mboB                                        | GATGAATTGGTTCTATTCCAAAGATAAGTG      | Primer for RT-PCR reaction of <i>mboIIM2ΔA356</i> mRNA pool (corresponding to residues 377-             |



|    |                    |                                        |                                                                                                                                                                                                                                                                                                       |
|----|--------------------|----------------------------------------|-------------------------------------------------------------------------------------------------------------------------------------------------------------------------------------------------------------------------------------------------------------------------------------------------------|
|    |                    |                                        | 406)                                                                                                                                                                                                                                                                                                  |
| 16 | mboB-P<br>(fwd)    | GTTATAGTCATATGAACACCATATTT             | Forward primer to proximal part of <i>mboIIM2</i> with NdeI site overlapping the ATG start codon. 16 and 17 were used for PCR to get shorter variants (377-378 nt) of wild-type <i>mboIIMΔ378</i> or mutated <i>mboIIM2ΔA356Δ377</i> genes, respectively, and <i>mboIIM2ΔA356Δ562</i> mutated variant |
| 17 | mboBdelta<br>(rev) | GGGATCCATTAATAAAAAGTTTGGTG             | Internal reverse primer to <i>mboIIM2</i> introducing BamHI site                                                                                                                                                                                                                                      |
| 18 | bamGFP<br>(fwd)    | GGGATCCAAAAGGAGAAGAAGCTTTTCACT<br>GGAG | Primers 18 and 21 were used in PCR to fuse 377 nt proximal part of <i>mboIIMΔ377</i> or <i>mboIIM2ΔA356Δ377</i> with <i>gfp</i> ( <i>gfp0</i> , frame 0)                                                                                                                                              |
| 19 | bamGF-1<br>(fwd)   | GGGATCCAAAGGAGAAGAAGCTTTTCACTG<br>GAG  | Primers 19 and 21 were used in PCR to fuse 377 nt proximal part of <i>mboIIMΔ377</i> or <i>mboIIM2ΔA356Δ377</i> with <i>gfp</i> ( <i>gfp-1</i> , frame -1).                                                                                                                                           |
| 20 | gfp-1A5<br>(fwd)   | AGGCTAGCTTAAAAACACCAAAGCTTTTTT<br>AA   | Primers 20 and 21 were used in PCR to fuse 28 nt part of <i>mboIIM2Δ356</i> gene (349-377 nt region, downstream of NheI site) with <i>gfp0</i> . As a template the plasmid pET24mboBΔA356Δ377gfp0 was used                                                                                            |

|     |                  |                                 |                                                                                                                                                                                                                                                                                                                                                    |
|-----|------------------|---------------------------------|----------------------------------------------------------------------------------------------------------------------------------------------------------------------------------------------------------------------------------------------------------------------------------------------------------------------------------------------------|
| 21  | Gfpdown<br>(rev) | CAGTGCCAAGCTTGCATGCCT           | Reverse primer to distal part of the <i>gfp</i> carrying on pGreenTIR plasmid (35)                                                                                                                                                                                                                                                                 |
| 22  | TnaGor<br>(fwd)  | CAAACCTTTTTTAAGGGATCCAAAAGGAG   | 22 and 23 were used in PCR to alter internal start codon ATG to AGG in a fused gene containing 28 nt part of <i>mboIIM2ΔA356</i> and <i>gfp0</i>                                                                                                                                                                                                   |
| 23  | TnaDol<br>(rev)  | CTTTTGGATCCCTTAAAAAAAGTTTGGTG   |                                                                                                                                                                                                                                                                                                                                                    |
| 24  | MboBR<br>(fwd)   | ACACCAAACCTTTTTTAATGGACACTTATC  | Forward primer for <i>mboIIM2ΔA356</i> mutagenesis                                                                                                                                                                                                                                                                                                 |
| 25  | MboBL1<br>(rev)  | CTTTAAAATGGTTTGTGTAATGTCGCTATTT | 24 and 25 were used in PCR reaction to replace AAA Lys 118 codon to synonymous AAG in <i>mboIIM2ΔA356</i> (interruption of L-tract poly(5A) run, (A <sub>5</sub> )mutL1)                                                                                                                                                                           |
| 26  | MboBL3<br>(rev)  | CTTCAGAATGGTTTGTGTAATGTCGCTATTT | 24 and 26 were used in PCR reaction to replace AAA Lys 118 codon to synonymous AAG, and TTA Leu 117 codon to synonymous CTG codon in <i>mboIIM2ΔA356</i> (interruption of L-tract poly(4T+5A) run, (A <sub>5</sub> )mutL3)                                                                                                                         |
| 26a |                  |                                 | 9 and 26 were used in PCR reaction to replace 6 nucleotides in codons AAA Lys 118 to synonymous AAG, TTA Leu 117 to synonymous CTG, AAC Asn 121 to AGC Ser codon, and TTT Phe 122 codon to TCT Ser, and TTT Phe 123 codon to TCT Ser in <i>mboIIM2ΔA356</i> (interruption of L-tract of poly(4T+5A), M region (triple A), and R-tract of poly(7T), |

|    |                        |                                       |                                                                                                                                                                                                                                    |
|----|------------------------|---------------------------------------|------------------------------------------------------------------------------------------------------------------------------------------------------------------------------------------------------------------------------------|
|    |                        |                                       | (A <sub>5</sub> )mutLMR6)                                                                                                                                                                                                          |
| 27 | MboBRII<br>(fwd)       | <u>T</u> AATGGACACTTATCTTTGGAATAGAACC | Forward primer for insertion of eighth <u>T</u> in <i>mboIIM2</i> or <i>mboIIM2ΔA356</i> mutagenesis                                                                                                                               |
| 28 | MboBLT2<br>(rev)       | GAAGAAGTTTGGTGTTTTTTAAAATGGTTTG       | 27 and 28 were used in PCR reaction to replace AAC Asn 121 codon to AGC Ser codon in <i>mboIIM2ΔA356</i> gene (interruption of M region (triple A), (A) <sub>5</sub> MutM1)                                                        |
| 29 | 3A377<br>(rev)         | AAAAAAGCTTGGTGTTTTTTAAAATGG           | 27 and 29 were used in PCR reaction to replace TTT Phe 122 codon to synonymous TTC, and TTT Leu 123 codon to synonymous TTC codon in <i>mboIIM2ΔA356</i> (interruption of R-tract poly(7T) run, (A) <sub>5</sub> MutR2)            |
| 30 | MboBLIII<br>plus (rev) | GTTTGGTAAAATTTTTGTGGTTTGAAAAA<br>A    | 27 and 30 were used in PCR reaction to insert additional T371 nucleotide <i>mboIIM2ΔA356</i> (restoration of ΔA356 frameshifting mutation, [ΔA356+T371] resulting in fixing four erroneous amino acids (119-Thr-Pro-Asn-Phe -122 ) |
| 31 | MboIIII2<br>plus (rev) | GTTTGGTAAAATTTTTGTGGTTTGAAAAA<br>AA   | 27 and 31 were used in PCR reaction to insert additional T372 nucleotide in <i>mboIIM2</i> (frameshifting mutation, pET24mboB+T372)                                                                                                |
| 32 | MboDL<br>(rev)         | TTTAAAATGGTTTGTGGTTGAATGTCGC          | Reverse primer for <i>mboIIM2ΔA356</i> mutagenesis                                                                                                                                                                                 |
| 33 | KLFpoliT               | AACACCAAGCTCTTCTTAATGGACACTT          | 32 and 33 were used in PCR                                                                                                                                                                                                         |

|    |                  |                                  |                                                                                                                                                                                                                              |
|----|------------------|----------------------------------|------------------------------------------------------------------------------------------------------------------------------------------------------------------------------------------------------------------------------|
|    | (fwd)            |                                  | reaction to replace AAC Asn 121 codon to AGC Ser, TTT Leu 122 codon to TCT Ser, and TTT Leu 123 codon to TCT Ser in <i>mboIIM2ΔA356</i> (interruption of M (triple A) tract and R-tract of poly(7T), (A) <sub>5</sub> MutR3) |
| 33 | mboB551 (rev)    | <u>GGGATCC</u> ACCCATTCTTGCTTAC  | Internal reverse primer to <i>mboIIM2ΔA356</i> introducing BamHI site in 562 nt.                                                                                                                                             |
| 34 | MboBright (fwd)  | GACACTTATCTTTGGAATAGAACC         | 34 and 35 were used for PCR to eliminate premature 124 TAA stop codon of <i>mboIIM2ΔA356</i> by changing distal A to C and replace overlapping 125 ATG codon with CTC for Leu (pET24mbo(A <sub>5</sub> )ΔStopMet)            |
| 35 | MboMetStop (rev) | <u>GAGT</u> AAAAAAAGTTTGGTGTTTTT |                                                                                                                                                                                                                              |
| 36 | ncuBR (fwd)      | CCAATCTTTTTTTGATGGATACTTATCTG    | 36 and 37 were used for PCR to delete A357 in <i>ncuIM2</i> (32)                                                                                                                                                             |
| 37 | ncuBL (rev)      | ATTTTTTAAAATAGTTTGTGGATGTCGCTG   |                                                                                                                                                                                                                              |
| 38 | mbo1G (fwd)      | CATTTTAAAAATGGTAAACGCTGGTTTCCC   | 38 and 39 were used in PCR to delete A462 in <i>mboIIM1</i> (29)                                                                                                                                                             |
| 39 | mbo1D (rev)      | GAACCAGCGTTTACCATTTTAAAATGCC     |                                                                                                                                                                                                                              |
| 40 | catDR (fwd)      | CCGTAAAAAAAATAAGCACAAGTTTTATCC   | 40 and 41 were used in PCR to delete G103 in <i>cat</i> from pDK178 plasmid (33)                                                                                                                                             |
| 41 | catDL (rev)      | CTTATTTTTTTTACGGTCTTTAAAAGGCCG   |                                                                                                                                                                                                                              |

**Supplementary Table S3. Errors frequency and sequencing depth of *mboIIM2A356* mRNA pool (1-376 nt)**

| base No | misincorporation rate (%) | insertions rate (%)   | deletions rate (%)    | homopolymer length | sequencing depth |
|---------|---------------------------|-----------------------|-----------------------|--------------------|------------------|
| 0       | 0.0                       | 0.0                   | 0.0                   | 1                  | 28289            |
| 1       | 0.0                       | 0.0                   | 0.0                   | 1                  | 28805            |
| 2       | 0.2713844039848849        | 0.0034352456200618343 | 0.0                   | 1                  | 29110            |
| 3       | 0.7649823333676374        | 0.0                   | 0.0                   | 2                  | 29151            |
| 4       | 0.26361737820534764       | 0.0                   | 0.0                   | 2                  | 29209            |
| 5       | 0.5952380952380952        | 0.0                   | 0.0034209085933223867 | 1                  | 29232            |
| 6       | 0.3726750547045952        | 0.0                   | 0.010257111597374179  | 1                  | 29248            |
| 7       | 0.4476795844439888        | 0.0                   | 0.0                   | 2                  | 29262            |
| 8       | 0.7273596503209945        | 0.0                   | 0.0                   | 2                  | 29284            |
| 9       | 0.3138860457181849        | 0.0                   | 0.0                   | 1                  | 29310            |
| 10      | 0.1159380754279479        | 0.0034099433949396443 | 0.0                   | 1                  | 29326            |
| 11      | 0.5685048322910745        | 1.0567501588469383    | 0.013376584289201751  | 1                  | 29903            |
| 12      | 0.3473381871618463        | 0.006679580522343197  | 0.28388217219958584   | 6                  | 29942            |
| 13      | 0.11315982160686948       | 0.0                   | 0.016641150236304334  | 6                  | 30046            |
| 14      | 0.09632951336987211       | 0.0                   | 0.0                   | 6                  | 30105            |
| 15      | 0.07602300522244992       | 0.0                   | 0.0                   | 6                  | 30254            |
| 16      | 0.10896843217540617       | 0.0                   | 0.0                   | 6                  | 30284            |
| 17      | 0.12535462162697103       | 0.10886059246552747   | 0.0                   | 6                  | 30314            |
| 18      | 0.19118568085176516       | 0.0                   | 0.019777829053630878  | 3                  | 30337            |
| 19      | 0.3591433278418451        | 0.0                   | 0.0                   | 3                  | 30350            |
| 20      | 0.4937621383192337        | 0.003291747588794891  | 0.0                   | 3                  | 30379            |
| 21      | 0.6252879615612452        | 0.0                   | 0.0032909892713749752 | 1                  | 30386            |
| 22      | 0.4343676988383955        | 0.003290664385139359  | 0.0                   | 1                  | 30389            |
| 23      | 0.45056896665131885       | 0.0                   | 0.0                   | 1                  | 30406            |
| 24      | 0.16435474327789099       | 0.0                   | 0.0                   | 1                  | 30422            |
| 25      | 0.8082196263211282        | 0.0                   | 0.009816432708353784  | 1                  | 30561            |
| 26      | 0.5105337986299598        | 0.0                   | 0.0032312265736073415 | 2                  | 30948            |
| 27      | 1.0484885634093621        | 0.0                   | 0.0                   | 2                  | 30997            |
| 28      | 0.8274800346386991        | 0.0                   | 0.0                   | 1                  | 31179            |
| 29      | 1.1158853331623164        | 0.0                   | 0.006413134098634002  | 1                  | 31186            |
| 30      | 0.5564438759194116        | 0.0                   | 0.0                   | 2                  | 31270            |
| 31      | 2.6054154278955277        | 0.0031968287458840833 | 0.006393657491768167  | 2                  | 31281            |
| 32      | 0.2173426662831208        | 0.003196215680634129  | 0.006392431361268258  | 1                  | 31287            |
| 33      | 0.3511460128966354        | 0.006384472961757006  | 0.003192236480878503  | 1                  | 31326            |
| 34      | 0.18510244462883768       | 0.0                   | 0.0                   | 1                  | 31334            |
| 35      | 1.1268137609769917        | 0.0                   | 0.0                   | 1                  | 31771            |
| 36      | 0.5331088664421998        | 0.0                   | 0.0                   | 1                  | 32076            |
| 37      | 0.6093011688634669        | 0.0031086794329768714 | 0.0                   | 2                  | 32168            |
| 38      | 0.23308574447586786       | 0.0                   | 0.0                   | 2                  | 32177            |
| 39      | 1.3926367048168482        | 0.0                   | 0.003101640767966254  | 1                  | 32241            |
| 40      | 0.6386210744954584        | 0.0                   | 0.0                   | 2                  | 32257            |
| 41      | 0.43324874667326857       | 0.0030946339048090613 | 0.0                   | 2                  | 32314            |
| 42      | 0.5501808178530585        | 0.003090903471084598  | 0.003090903471084598  | 1                  | 32353            |
| 43      | 2.1419299004759846        | 0.009272423811584348  | 0.0                   | 1                  | 32354            |
| 44      | 0.43556159644136905       | 0.00308908933646361   | 0.00308908933646361   | 1                  | 32372            |
| 45      | 0.3631886734379809        | 0.0                   | 0.012311480455524777  | 3                  | 32490            |
| 46      | 0.6412026384414787        | 0.0                   | 0.0                   | 3                  | 32595            |
| 47      | 0.3544810034539175        | 0.0                   | 0.0                   | 3                  | 33006            |
| 48      | 0.40563039200847584       | 0.0                   | 0.00908127743302558   | 2                  | 33035            |
| 49      | 0.34349764975292274       | 0.0030131372785344103 | 0.01506568639267205   | 2                  | 33188            |

|     |                     |                       |                       |   |       |
|-----|---------------------|-----------------------|-----------------------|---|-------|
| 50  | 0.09627534749383236 | 0.0030086046091822613 | 0.027077441482640352  | 1 | 33238 |
| 51  | 0.15904453246909134 | 0.0030008402352658743 | 0.0030008402352658743 | 2 | 33324 |
| 52  | 0.4158937226976243  | 0.0                   | 0.0                   | 2 | 33422 |
| 53  | 0.1645228836374514  | 0.0                   | 0.0                   | 1 | 33430 |
| 54  | 0.5611805576175064  | 0.0                   | 0.0029692092995635263 | 1 | 33679 |
| 55  | 1.029948650975038   | 0.0029681517319165357 | 0.008904455195749606  | 1 | 33691 |
| 56  | 0.5107732049550872  | 0.0                   | 0.0                   | 1 | 34066 |
| 57  | 0.5081330490903251  | 0.0                   | 0.005840609759658909  | 1 | 34243 |
| 58  | 0.9381575870937573  | 0.0                   | 0.005845218611176058  | 1 | 34216 |
| 59  | 0.2598464278415229  | 0.005839245569472424  | 0.002919622784736212  | 1 | 34251 |
| 60  | 0.4493201843963355  | 0.0                   | 0.0                   | 1 | 34274 |
| 61  | 0.2570018398995357  | 0.002920475453403814  | 0.005840950906807628  | 1 | 34241 |
| 62  | 0.16054644170704652 | 0.0                   | 0.0                   | 1 | 34258 |
| 63  | 0.30413625304136255 | 0.01737921445950643   | 0.002896535743251072  | 1 | 34524 |
| 64  | 0.19690169393369047 | 0.0                   | 0.014478065730418415  | 2 | 34535 |
| 65  | 0.2229105752250818  | 0.005789885070781345  | 0.008684827606172018  | 2 | 34543 |
| 66  | 0.30973195160076417 | 0.0028946911364557404 | 0.008684073409367221  | 1 | 34546 |
| 67  | 0.14174549451820995 | 0.0                   | 0.005785530388498366  | 2 | 34569 |
| 68  | 0.1268212115849702  | 0.0                   | 0.0                   | 2 | 33906 |
| 69  | 0.1799516195645761  | 0.0                   | 0.0                   | 1 | 33898 |
| 70  | 0.12983947119924458 | 0.005901794145420208  | 0.008852691218130312  | 2 | 33888 |
| 71  | 0.10349824052991098 | 0.0                   | 0.0                   | 2 | 33817 |
| 72  | 0.32238029043802313 | 0.002957617343468102  | 0.002957617343468102  | 1 | 33811 |
| 73  | 0.35371101809821376 | 0.008842775452455345  | 0.005895183634970229  | 1 | 33926 |
| 74  | 0.16598002311864607 | 0.0                   | 0.005927857968523074  | 2 | 33739 |
| 75  | 0.1274338381293898  | 0.0                   | 0.0                   | 2 | 33743 |
| 76  | 0.33749777961987093 | 0.0029605068387707975 | 0.0                   | 1 | 33778 |
| 77  | 0.6925740669488265  | 0.0                   | 0.00591943646964809   | 1 | 33787 |
| 78  | 0.3969899863719855  | 0.0                   | 0.005925223677193814  | 2 | 33754 |
| 79  | 0.4976598139700219  | 0.0029622607974406066 | 0.0                   | 2 | 33758 |
| 80  | 0.20881186051367717 | 0.0                   | 0.0029830265787668168 | 1 | 33523 |
| 81  | 0.3512322895582808  | 0.0                   | 0.0                   | 2 | 33596 |
| 82  | 0.3889216263995286  | 0.0                   | 0.0                   | 2 | 33940 |
| 83  | 0.1324893272486383  | 0.0                   | 0.002944207272191962  | 2 | 33965 |
| 84  | 0.17666283897182228 | 0.0029443806495303712 | 0.0                   | 2 | 33963 |
| 85  | 0.7851324727262035  | 0.01470285529449819   | 0.0                   | 1 | 34007 |
| 86  | 0.16654978962131836 | 0.0                   | 0.029219261337073397  | 4 | 34224 |
| 87  | 0.22744503411675512 | 0.0                   | 0.0                   | 4 | 34294 |
| 88  | 0.11665208515602217 | 0.0                   | 0.0                   | 4 | 34290 |
| 89  | 0.09946173648490522 | 0.005850690381465013  | 0.0                   | 4 | 34184 |
| 90  | 0.23964497041420119 | 0.0                   | 0.0029585798816568047 | 2 | 33800 |
| 91  | 0.13784423601330495 | 0.0                   | 0.0                   | 2 | 33371 |
| 92  | 0.10791043433949822 | 0.0                   | 0.0029975120649860616 | 1 | 33361 |
| 93  | 0.09532888465204957 | 0.003177629488401653  | 0.0                   | 1 | 31470 |
| 94  | 0.11434379367297676 | 0.0                   | 0.0031762164909160204 | 2 | 31484 |
| 95  | 0.11870388193776066 | 0.0                   | 0.0                   | 2 | 31170 |
| 96  | 0.5019824669891965  | 0.0                   | 0.003637554108617366  | 2 | 27491 |
| 97  | 0.17966360856269112 | 0.0                   | 0.0                   | 2 | 26160 |
| 98  | 0.25847650904667785 | 0.0                   | 0.0                   | 2 | 26308 |
| 99  | 0.6708806763097686  | 0.0                   | 0.0                   | 2 | 25787 |
| 100 | 0.2923562974489555  | 0.0                   | 0.0                   | 1 | 21207 |
| 101 | 0.22748375116063138 | 0.004642525533890436  | 0.0                   | 1 | 21540 |
| 102 | 0.0985630544171811  | 0.0                   | 0.0                   | 1 | 19277 |
| 103 | 0.14520032266738372 | 0.0                   | 0.005377789728421619  | 1 | 18595 |

|     |                     |                       |                       |   |       |
|-----|---------------------|-----------------------|-----------------------|---|-------|
| 104 | 0.10198604401502952 | 0.0                   | 0.0                   | 1 | 18630 |
| 105 | 0.2733612273361227  | 0.0                   | 0.0                   | 1 | 17925 |
| 106 | 0.34700494908697876 | 0.0                   | 0.005688605722737357  | 2 | 17579 |
| 107 | 0.4703082502266546  | 0.005666364460562103  | 0.0                   | 2 | 17648 |
| 108 | 0.2332633543270352  | 0.0                   | 0.040821087007231166  | 3 | 17148 |
| 109 | 0.13159468835985166 | 0.0                   | 0.0                   | 3 | 16718 |
| 110 | 0.4072171407091843  | 0.0                   | 0.0                   | 3 | 15962 |
| 111 | 0.8635254364557912  | 0.0                   | 0.012514861397910018  | 1 | 15981 |
| 112 | 0.3650783659595896  | 0.0                   | 0.0                   | 1 | 15887 |
| 113 | 0.1941990853849527  | 0.006264486625321055  | 0.0                   | 1 | 15963 |
| 114 | 0.33110514150059345 | 0.0                   | 0.006247266820765915  | 2 | 16007 |
| 115 | 0.4931951554501186  | 0.0                   | 0.0                   | 2 | 16018 |
| 116 | 0.7676818525044048  | 0.0                   | 0.006292474200855777  | 2 | 15892 |
| 117 | 0.0881667611310536  | 0.006297625795075257  | 0.0                   | 2 | 15879 |
| 118 | 0.25501412916121025 | 0.0                   | 0.0                   | 1 | 14509 |
| 119 | 0.10341974627688913 | 0.0                   | 0.0                   | 1 | 14504 |
| 120 | 0.3645285664213109  | 0.007010164738871364  | 0.0                   | 1 | 14265 |
| 121 | 0.6140534505617193  | 0.0                   | 0.020933640360058615  | 1 | 14331 |
| 122 | 0.3942359978249048  | 0.0                   | 0.0                   | 1 | 14712 |
| 123 | 0.12232415902140673 | 0.020387359836901122  | 0.0                   | 1 | 14715 |
| 124 | 0.11118059898547704 | 0.0                   | 0.0                   | 1 | 14391 |
| 125 | 0.21079258010118043 | 0.0                   | 0.0070264193367060145 | 3 | 14232 |
| 126 | 0.2937062937062937  | 0.0                   | 0.0                   | 3 | 14300 |
| 127 | 0.3217458208015668  | 0.006994474365251452  | 0.0                   | 3 | 14297 |
| 128 | 0.11900595029751487 | 0.0                   | 0.0                   | 1 | 14285 |
| 129 | 0.16349161216946262 | 0.0                   | 0.0071083309638896785 | 1 | 14068 |
| 130 | 0.6592939174819226  | 0.0                   | 0.00708918190840777   | 1 | 14106 |
| 131 | 0.47771836007130125 | 0.0                   | 0.0                   | 2 | 14025 |
| 132 | 0.4999285816311956  | 0.0                   | 0.0                   | 2 | 14002 |
| 133 | 0.23546200499464856 | 0.007135212272565109  | 0.007135212272565109  | 1 | 14015 |
| 134 | 0.07830853563038372 | 0.0                   | 0.0                   | 1 | 14047 |
| 135 | 0.2991239940175201  | 0.0                   | 0.0                   | 1 | 14041 |
| 136 | 0.5257175333901677  | 0.0                   | 0.014208581983518044  | 1 | 14076 |
| 137 | 0.3183812084335645  | 0.0                   | 0.007075137965190322  | 1 | 14134 |
| 138 | 0.20122170319798777 | 0.0                   | 0.0                   | 2 | 13915 |
| 139 | 0.2443055256161529  | 0.0071854566357692036 | 0.0                   | 2 | 13917 |
| 140 | 0.20708369037417879 | 0.007140816909454442  | 0.0                   | 1 | 14004 |
| 141 | 0.7515598411798071  | 0.0                   | 0.007090187180941577  | 3 | 14104 |
| 142 | 0.36521983424638294 | 0.0                   | 0.0                   | 3 | 14238 |
| 143 | 0.12701100762066045 | 0.007056167090036692  | 0.007056167090036692  | 3 | 14172 |
| 144 | 0.27399185049880564 | 0.0                   | 0.01405086412814388   | 1 | 14234 |
| 145 | 0.21493050580312367 | 0.0                   | 0.0                   | 1 | 13958 |
| 146 | 0.19233509046872774 | 0.0                   | 0.0                   | 1 | 14038 |
| 147 | 0.3039739027283511  | 0.0                   | 0.0                   | 1 | 13488 |
| 148 | 0.6556169429097606  | 0.0                   | 0.014732965009208102  | 1 | 13575 |
| 149 | 0.5083247384706056  | 0.007367025195226167  | 0.0                   | 1 | 13574 |
| 150 | 0.17173150153065034 | 0.0                   | 0.0                   | 1 | 13393 |
| 151 | 0.2129673450070989  | 0.0                   | 0.0                   | 1 | 12678 |
| 152 | 0.2342651881930345  | 0.0                   | 0.0                   | 1 | 12806 |
| 153 | 0.18695956999298902 | 0.0                   | 0.0                   | 1 | 12837 |
| 154 | 0.28004667444574094 | 0.0                   | 0.046674445740956826  | 3 | 12855 |
| 155 | 0.19452225334578274 | 0.0                   | 0.007780890133831311  | 3 | 12852 |
| 156 | 0.29466501240694787 | 0.0                   | 0.0                   | 3 | 12896 |
| 157 | 0.08527792852159082 | 0.0                   | 0.007752538956508256  | 2 | 12899 |

|     |                     |                       |                      |   |       |
|-----|---------------------|-----------------------|----------------------|---|-------|
| 158 | 0.10683760683760685 | 0.0                   | 0.0                  | 2 | 13104 |
| 159 | 0.17358490566037735 | 0.0                   | 0.0                  | 2 | 13250 |
| 160 | 0.391713747645951   | 0.0                   | 0.0                  | 2 | 13275 |
| 161 | 0.3371796793046606  | 0.00749288176232579   | 0.0                  | 1 | 13346 |
| 162 | 0.13259496139146712 | 0.0                   | 0.0                  | 1 | 12821 |
| 163 | 0.3148366784730421  | 0.0                   | 0.0                  | 1 | 12705 |
| 164 | 0.14938281311423854 | 0.0                   | 0.007862253321802029 | 1 | 12719 |
| 165 | 0.11091744572967835 | 0.0                   | 0.0                  | 1 | 12622 |
| 166 | 0.20558235154582113 | 0.0                   | 0.0                  | 2 | 12647 |
| 167 | 0.1738305941845765  | 0.0                   | 0.0                  | 2 | 12656 |
| 168 | 0.2601087727595176  | 0.0                   | 0.0                  | 1 | 12687 |
| 169 | 0.2670856245090338  | 0.0                   | 0.0                  | 1 | 12730 |
| 170 | 0.20409765287699191 | 0.0                   | 0.0                  | 1 | 12739 |
| 171 | 0.5345491706626838  | 0.0                   | 0.0                  | 1 | 12721 |
| 172 | 0.2817562808170932  | 0.0                   | 0.0                  | 1 | 12777 |
| 173 | 0.2189039168165116  | 0.0                   | 0.0                  | 1 | 12791 |
| 174 | 0.07789375292101573 | 0.0                   | 0.0                  | 1 | 12838 |
| 175 | 0.23531257353517923 | 0.0                   | 0.0                  | 1 | 12749 |
| 176 | 0.08577666874610106 | 0.0                   | 0.0                  | 1 | 12824 |
| 177 | 0.10409993593850095 | 0.0                   | 0.0                  | 1 | 12488 |
| 178 | 0.3665987780040733  | 0.0                   | 0.0                  | 2 | 12275 |
| 179 | 0.21897810218978103 | 0.0                   | 0.0                  | 2 | 12330 |
| 180 | 0.09726837967090865 | 0.0                   | 0.01621139661181811  | 1 | 12337 |
| 181 | 0.3168928252214187  | 0.0                   | 0.008125457056959454 | 1 | 12307 |
| 182 | 0.14625822702527017 | 0.0                   | 0.008125457056959454 | 2 | 12307 |
| 183 | 0.15428339423467316 | 0.0                   | 0.0                  | 2 | 12315 |
| 184 | 0.26632233072391254 | 0.0                   | 0.0                  | 1 | 12391 |
| 185 | 0.16121231662098987 | 0.0                   | 0.0                  | 1 | 12406 |
| 186 | 0.21580345285524566 | 0.0                   | 0.0                  | 1 | 12048 |
| 187 | 0.1784651992861392  | 0.0                   | 0.008498342823149485 | 1 | 11767 |
| 188 | 0.16064936163016824 | 0.0                   | 0.01691045911896508  | 1 | 11827 |
| 189 | 0.34675236806495263 | 0.008457374830852503  | 0.0                  | 1 | 11824 |
| 190 | 0.1199040767386091  | 0.007993605115907274  | 0.007993605115907274 | 1 | 12510 |
| 191 | 0.04769854519437157 | 0.0                   | 0.0                  | 1 | 12579 |
| 192 | 0.606633577562436   | 0.11029701410226109   | 0.0                  | 1 | 12693 |
| 193 | 0.37813140066172996 | 0.0                   | 0.0                  | 3 | 12694 |
| 194 | 0.2521273242987709  | 0.0                   | 0.0                  | 3 | 12692 |
| 195 | 0.1193222496221462  | 0.0                   | 0.0                  | 3 | 12571 |
| 196 | 0.14322087842138764 | 0.0                   | 0.0                  | 1 | 12568 |
| 197 | 0.17121955015954549 | 0.0                   | 0.0                  | 1 | 12849 |
| 198 | 0.3409181003726314  | 0.0                   | 0.007928327915642592 | 2 | 12613 |
| 199 | 0.0619147124835539  | 0.09287206872533085   | 0.0                  | 2 | 12921 |
| 200 | 0.25228166505898936 | 0.0                   | 0.014840097944646434 | 4 | 13477 |
| 201 | 0.21554927902482532 | 0.0                   | 0.0                  | 4 | 13454 |
| 202 | 0.31310571045176677 | 0.0                   | 0.0                  | 4 | 13414 |
| 203 | 0.14916467780429593 | 0.0                   | 0.0                  | 4 | 13408 |
| 204 | 0.18967026553837174 | 0.021885030639042895  | 0.007295010213014297 | 1 | 13708 |
| 205 | 1.0477385080793922  | 0.0                   | 0.007378440197742197 | 3 | 13553 |
| 206 | 0.17696504940274296 | 0.0                   | 0.0                  | 3 | 13562 |
| 207 | 0.06032727546942161 | 0.0                   | 0.0                  | 3 | 13261 |
| 208 | 0.3475107652791418  | 0.0                   | 0.015109163707788774 | 2 | 13237 |
| 209 | 0.3681442524417731  | 0.0075131480090157785 | 0.0                  | 2 | 13310 |
| 210 | 0.23027004396064477 | 0.0                   | 0.006977880120019537 | 1 | 14331 |
| 211 | 0.24227740763173833 | 0.0                   | 0.013459855979541017 | 2 | 14859 |



|     |                      |                       |                       |   |       |
|-----|----------------------|-----------------------|-----------------------|---|-------|
| 212 | 0.22202785440355247  | 0.0                   | 0.0067281168001076495 | 2 | 14863 |
| 213 | 0.1275767138924327   | 0.0                   | 0.006714563889075404  | 1 | 14893 |
| 214 | 0.24808904385141475  | 0.0067051092932814815 | 0.0                   | 2 | 14914 |
| 215 | 0.17790202681237688  | 0.0                   | 0.0                   | 2 | 15739 |
| 216 | 0.08823344047393962  | 0.0                   | 0.006302388605281401  | 1 | 15867 |
| 217 | 0.11120215381013696  | 0.0                   | 0.0058527449373756285 | 1 | 17086 |
| 218 | 0.7064043435110048   | 0.0                   | 0.005838052425710783  | 1 | 17129 |
| 219 | 0.18927743339800313  | 0.0                   | 0.0                   | 1 | 21133 |
| 220 | 0.120817843866171    | 0.0                   | 0.0                   | 2 | 21520 |
| 221 | 0.09178943503602735  | 0.0                   | 0.0                   | 2 | 21789 |
| 222 | 0.21381227282446014  | 0.0                   | 0.0                   | 1 | 23385 |
| 223 | 0.393301192590713    | 0.008458090163241139  | 0.0042290450816205695 | 1 | 23646 |
| 224 | 0.15223918467458875  | 0.004228866240960799  | 0.0                   | 1 | 23647 |
| 225 | 0.17824573039296965  | 0.037307245896202955  | 0.00414524954402255   | 1 | 24124 |
| 226 | 0.4757177132456358   | 0.0                   | 0.02482005460412013   | 4 | 24174 |
| 227 | 0.07489750867234311  | 0.0                   | 0.0                   | 4 | 25368 |
| 228 | 0.046598322460391424 | 0.0                   | 0.0                   | 4 | 25752 |
| 229 | 0.05350454788657035  | 0.3057402736375449    | 0.0                   | 4 | 26166 |
| 230 | 0.1625463067967037   | 0.0                   | 0.03024117335752627   | 4 | 26454 |
| 231 | 0.15784726398075768  | 0.0                   | 0.0                   | 4 | 26608 |
| 232 | 0.21879361726206192  | 0.0                   | 0.0                   | 4 | 26509 |
| 233 | 0.17759360663016133  | 0.007399733609590054  | 0.0                   | 4 | 27028 |
| 234 | 0.12799544905070043  | 0.003555429140297234  | 0.003555429140297234  | 2 | 28126 |
| 235 | 0.21909554619834992  | 0.0                   | 0.0                   | 2 | 29211 |
| 236 | 0.5581951689537163   | 0.0                   | 0.0033225902913911684 | 1 | 30097 |
| 237 | 0.2032197631219636   | 0.0                   | 0.0031753087987806813 | 2 | 31493 |
| 238 | 0.1484296146767203   | 0.0                   | 0.0                   | 2 | 33686 |
| 239 | 0.161527589489169    | 0.005768842481756036  | 0.0                   | 1 | 34669 |
| 240 | 0.1748920588074548   | 0.0                   | 0.010930753675465924  | 2 | 36594 |
| 241 | 0.16939283256577206  | 0.0026467630088401885 | 0.0                   | 2 | 37782 |
| 242 | 0.1860032550569635   | 0.005166757084915653  | 0.007750135627373479  | 1 | 38709 |
| 243 | 0.12868138004710225  | 0.0                   | 0.004855901133852915  | 3 | 41187 |
| 244 | 0.14040932889100427  | 0.0                   | 0.0                   | 3 | 42020 |
| 245 | 0.10991426687183997  | 0.006594856012310399  | 0.0                   | 3 | 45490 |
| 246 | 0.09434790240477445  | 0.0                   | 0.004388274530454626  | 2 | 45576 |
| 247 | 0.06585828845930346  | 0.0                   | 0.0                   | 2 | 51626 |
| 248 | 0.10158685676253196  | 0.0                   | 0.0070059901215539285 | 2 | 57094 |
| 249 | 0.12003978461432932  | 0.0                   | 0.0                   | 2 | 58314 |
| 250 | 0.4480609774939486   | 0.0017167087260304542 | 0.005150126178091363  | 2 | 58251 |
| 251 | 0.08273930753564154  | 0.004773421588594704  | 0.0                   | 2 | 62848 |
| 252 | 0.22332907244971423  | 0.001469270213484962  | 0.001469270213484962  | 1 | 68061 |
| 253 | 0.12760340275740686  | 0.0014667057788207685 | 0.004400117336462306  | 1 | 68180 |
| 254 | 0.1398924322268702   | 0.002716357907317868  | 0.002716357907317868  | 1 | 73628 |
| 255 | 0.07319234176971379  | 0.0                   | 0.006420380856992436  | 2 | 77877 |
| 256 | 0.07505406436840097  | 0.003816308357715303  | 0.0                   | 2 | 78610 |
| 257 | 0.06477095213299636  | 0.0                   | 0.0                   | 1 | 78739 |
| 258 | 0.3484852338920968   | 0.001271843919314222  | 0.011446595273827995  | 1 | 78626 |
| 259 | 0.08144240768816328  | 0.0012529601182794353 | 0.005011840473117741  | 1 | 79811 |
| 260 | 0.15781760793597113  | 0.005010082791618131  | 0.0037575620937135984 | 1 | 79839 |
| 261 | 0.12234553875731888  | 0.0                   | 0.002496847729741202  | 2 | 80101 |
| 262 | 0.08265969731963775  | 0.00850908648878624   | 0.0                   | 2 | 82265 |
| 263 | 0.11598965758886501  | 0.0012082255998840104 | 0.024164511997680205  | 3 | 82766 |
| 264 | 0.06403595679385254  | 0.0                   | 0.0036246767996520315 | 3 | 82766 |
| 265 | 0.08218019215662578  | 0.009668257900779503  | 0.0                   | 3 | 82745 |

|     |                     |                       |                       |   |       |
|-----|---------------------|-----------------------|-----------------------|---|-------|
| 266 | 0.06775641568561024 | 0.0                   | 0.0036298079831576908 | 2 | 82649 |
| 267 | 0.0738016308950565  | 0.00362958840467491   | 0.0                   | 2 | 82654 |
| 268 | 0.13022403356886197 | 0.0                   | 0.0036173342658017216 | 1 | 82934 |
| 269 | 0.20865936358894105 | 0.0035566936975387677 | 0.0071133873950775355 | 1 | 84348 |
| 270 | 0.11662288400146074 | 0.0                   | 0.011780089293076841  | 2 | 84889 |
| 271 | 0.16793982156393958 | 0.00699749256516415   | 0.0                   | 2 | 85745 |
| 272 | 0.06328520532533283 | 0.0                   | 0.002343896493530846  | 2 | 85328 |
| 273 | 0.10436087756944688 | 0.003517782389981356  | 0.0                   | 2 | 85281 |
| 274 | 0.111333778668448   | 0.003515803536898358  | 0.00468773804919781   | 1 | 85329 |
| 275 | 0.35109820251717583 | 0.011664392110205177  | 0.01049795289918466   | 1 | 85731 |
| 276 | 0.11063621647431493 | 0.0023291835047224195 | 0.006987550514167258  | 2 | 85867 |
| 277 | 0.05910576455044851 | 3.7792921215492665    | 0.0                   | 2 | 86286 |
| 278 | 0.3849888615982179  | 0.0034272005483520877 | 0.31416005026560806   | 7 | 87535 |
| 279 | 0.04845343399628148 | 0.0011268240464251506 | 0.005634120232125754  | 7 | 88745 |
| 280 | 0.05052716677333513 | 0.0                   | 0.0                   | 7 | 89061 |
| 281 | 0.04228282760846102 | 0.006676235938178055  | 0.0                   | 7 | 89871 |
| 282 | 0.12649316936885407 | 0.0021998812064148534 | 0.0                   | 7 | 90914 |
| 283 | 0.0691449079714201  | 0.016463073326528598  | 0.0                   | 7 | 91113 |
| 284 | 0.09220231822971549 | 0.01097646645591851   | 0.0021952932911837022 | 7 | 91104 |
| 285 | 0.3231530978880028  | 0.003286302690386469  | 0.018622381912189994  | 1 | 91288 |
| 286 | 0.09440175631174534 | 0.0                   | 0.0032930845225027446 | 1 | 91100 |
| 287 | 0.15301884317754558 | 0.008743933895859748  | 0.005464958684912342  | 1 | 91492 |
| 288 | 0.11353959693443089 | 0.004366907574401188  | 0.003275180680800891  | 1 | 91598 |
| 289 | 0.15261268619822455 | 0.0                   | 0.0032242116802441803 | 1 | 93046 |
| 290 | 0.1534153694306466  | 0.001072834751263263  | 0.0032185042537897883 | 1 | 93211 |
| 291 | 0.0945138978390686  | 0.0                   | 0.0032220646990591575 | 2 | 93108 |
| 292 | 0.08602335534097508 | 0.004301167767048753  | 0.0                   | 2 | 92998 |
| 293 | 0.1999226106023475  | 0.0010748527451739111 | 0.0                   | 1 | 93036 |
| 294 | 0.8581389112362564  | 0.0010726736390453205 | 0.006436041834271923  | 1 | 93225 |
| 295 | 0.10932710240305259 | 0.0                   | 0.0075028403609938045 | 3 | 93298 |
| 296 | 0.13273673167911967 | 0.0                   | 0.0                   | 3 | 93418 |
| 297 | 0.0983936172488289  | 0.00855596671728947   | 0.0                   | 3 | 93502 |
| 298 | 0.07834999152973064 | 0.003176351007962053  | 0.0010587836693206844 | 1 | 94448 |
| 299 | 0.15548645046645934 | 0.0010577309555541451 | 0.012692771466649743  | 2 | 94542 |
| 300 | 0.09938571171799833 | 0.002114589611021241  | 0.0010572948055106205 | 2 | 94581 |
| 301 | 0.10216352549299221 | 0.005321016952760011  | 0.0021284067811040046 | 1 | 93967 |
| 302 | 0.0872294026913462  | 0.002127546407106005  | 0.0010637732035530024 | 1 | 94005 |
| 303 | 0.545955687480123   | 0.0031803243930880946 | 0.007420756917205554  | 1 | 94330 |
| 304 | 0.06886395660511288 | 0.0                   | 0.003178336458697518  | 2 | 94389 |
| 305 | 0.11085069994299107 | 0.00527860475919005   | 0.0                   | 2 | 94722 |
| 306 | 0.11855113576222029 | 0.00423396913436501   | 0.002116984567182505  | 1 | 94474 |
| 307 | 0.40408741828336897 | 0.0031734614001311698 | 0.0031734614001311698 | 1 | 94534 |
| 308 | 0.2866602494261506  | 0.003173360694754435  | 0.0010577868982514782 | 1 | 94537 |
| 309 | 0.11209932423143223 | 0.0021150815892723063 | 0.0031726223839084592 | 1 | 94559 |
| 310 | 0.1769367689438888  | 0.0                   | 0.004238006441769792  | 1 | 94384 |
| 311 | 0.1133630690667147  | 0.01059467935202941   | 0.005297339676014705  | 1 | 94387 |
| 312 | 0.14951170114625636 | 0.22479773505678263   | 0.009543300073165301  | 1 | 94307 |
| 313 | 0.13147431479616178 | 0.0                   | 0.02756719503790489   | 5 | 94315 |
| 314 | 0.06353509254945149 | 0.0021178364183150494 | 0.0021178364183150494 | 5 | 94436 |
| 315 | 0.08366516987206642 | 0.0                   | 0.0                   | 5 | 94424 |
| 316 | 0.06890995059686619 | 0.0                   | 0.0                   | 5 | 94326 |
| 317 | 0.05620241352251278 | 0.0021208457933023688 | 0.0                   | 5 | 94302 |
| 318 | 0.14639269309514466 | 0.0042432664665259315 | 0.0010608166166314829 | 1 | 94267 |
| 319 | 0.10510446747069815 | 0.002123322575165619  | 0.002123322575165619  | 1 | 94192 |

|     |                      |                       |                       |   |       |
|-----|----------------------|-----------------------|-----------------------|---|-------|
| 320 | 0.11358569881743487  | 0.0                   | 0.009553937283709476  | 3 | 94202 |
| 321 | 0.05839447057449542  | 0.0                   | 0.0021234352936180152 | 3 | 94187 |
| 322 | 0.0775234959910795   | 0.012743588382095258  | 0.0021239313970158767 | 3 | 94165 |
| 323 | 0.055262710423397386 | 0.0                   | 0.006376466587315083  | 3 | 94096 |
| 324 | 0.06061830672863205  | 0.0                   | 0.0021269581308291947 | 3 | 94031 |
| 325 | 0.28625852656670675  | 0.0010641580913260474 | 0.0042566323653041895 | 3 | 93971 |
| 326 | 0.14259870171331276  | 0.0021283388315419816 | 0.004256677663083963  | 1 | 93970 |
| 327 | 0.20995193486161287  | 0.0021314917244833797 | 0.004262983448966759  | 1 | 93831 |
| 328 | 0.23547713421131142  | 0.004262029578485275  | 0.0031965221838639564 | 1 | 93852 |
| 329 | 0.11291009799744355  | 0.0010651896037494673 | 0.0021303792074989347 | 1 | 93880 |
| 330 | 0.23981070941336968  | 0.001065825375170532  | 0.002131650750341064  | 1 | 93824 |
| 331 | 0.28483038190740345  | 0.002133560913164071  | 0.0074674631960742486 | 1 | 93740 |
| 332 | 0.11521474748767842  | 0.001066803217478504  | 0.00533401608739252   | 1 | 93738 |
| 333 | 0.1846061912434774   | 0.0010670878106559388 | 0.0010670878106559388 | 1 | 93713 |
| 334 | 0.13231888852133644  | 0.0                   | 0.005335439053279694  | 2 | 93713 |
| 335 | 0.09082360986451254  | 0.006411078343377357  | 0.0                   | 2 | 93588 |
| 336 | 0.08762275199555475  | 0.007479991024010771  | 0.007479991024010771  | 1 | 93583 |
| 337 | 0.1518635367092669   | 0.0010694615261215977 | 0.004277846104486391  | 2 | 93505 |
| 338 | 0.10068767540007284  | 0.007498018380856487  | 0.0                   | 2 | 93358 |
| 339 | 0.07712412699772912  | 0.02463687390205236   | 0.0                   | 1 | 93356 |
| 340 | 0.06589465497126562  | 0.0                   | 0.003240720736291751  | 3 | 92572 |
| 341 | 0.0659616341183849   | 0.0010813382642358182 | 0.0                   | 3 | 92478 |
| 342 | 0.6086466816842835   | 0.011913013342574942  | 0.0                   | 3 | 92336 |
| 343 | 0.07689641727678379  | 0.0                   | 0.002166096261317853  | 2 | 92332 |
| 344 | 0.086687038120625    | 0.014086643694601565  | 0.0                   | 2 | 92286 |
| 345 | 0.08995437254115683  | 0.060692106774756414  | 0.0032513628629333795 | 1 | 92269 |
| 346 | 0.08453451826162349  | 0.004335103500596077  | 0.01192153462663921   | 4 | 92270 |
| 347 | 0.05311422810935027  | 0.004335855355865328  | 0.0                   | 4 | 92254 |
| 348 | 0.04898599006858035  | 0.02394870622557504   | 0.0                   | 4 | 91863 |
| 349 | 0.09162503545016253  | 10.474704945570366    | 0.0                   | 4 | 91678 |
| 350 | 0.0805606135849473   | 0.006621420294653203  | 0.04414280196435469   | 5 | 90615 |
| 351 | 0.05079337036096419  | 0.005521018517496108  | 0.007729425924494551  | 5 | 90563 |
| 352 | 0.0342514943595523   | 0.007734208403769874  | 0.0                   | 5 | 90507 |
| 353 | 0.07522956079212302  | 0.02212634140944795   | 0.0                   | 5 | 90390 |
| 354 | 0.2712256285987417   | 0.015562126231075344  | 0.0                   | 5 | 89962 |
| 355 | 0.10810931300432437  | 0.003343587000133743  | 0.008916232000356648  | 1 | 89724 |
| 356 | 0.9522110474321521   | 0.005575006132506746  | 0.0078050085855094434 | 1 | 89686 |
| 357 | 0.04683214022880846  | 0.0033451528734863185 | 0.0011150509578287727 | 2 | 89682 |
| 358 | 0.05358039850421387  | 0.021208907741251323  | 0.0                   | 2 | 89585 |
| 359 | 0.06720129026477308  | 0.0                   | 0.010080193539715962  | 3 | 89284 |
| 360 | 0.07813384667648057  | 0.0                   | 0.0                   | 3 | 88310 |
| 361 | 0.6833946490198982   | 0.004555964326799321  | 0.0                   | 3 | 87797 |
| 362 | 0.06378568011481422  | 1.1948424721507165    | 0.001139030002050254  | 1 | 87794 |
| 363 | 2.186267223143331    | 0.0034303356011663143 | 1.9781601966725744    | 7 | 87455 |
| 364 | 0.21049019047074302  | 0.0022879368529428587 | 0.09838128467654292   | 7 | 87415 |
| 365 | 0.06299537270353232  | 0.0                   | 0.0011453704127914969 | 7 | 87308 |
| 366 | 0.04621552610599531  | 0.0011553881526498826 | 0.0                   | 7 | 86551 |
| 367 | 0.03141873021783653  | 0.0                   | 0.0                   | 7 | 85936 |
| 368 | 0.02366359828675548  | 0.0023663598286755485 | 0.0011831799143377742 | 7 | 84518 |
| 369 | 0.036957191253464736 | 0.013550970126270405  | 0.0024638127502309825 | 7 | 81175 |
| 370 | 0.06546938985096086  | 0.0                   | 0.015404562317873145  | 2 | 77899 |
| 371 | 0.061901937014779085 | 0.0                   | 0.0012896236878078976 | 2 | 77542 |
| 372 | 0.05804728919159475  | 0.0012899397598132168 | 0.0012899397598132168 | 1 | 77523 |
| 373 | 0.11278540609303483  | 0.0                   | 0.0                   | 2 | 76251 |

|     |                           |                              |                              |   |       |
|-----|---------------------------|------------------------------|------------------------------|---|-------|
| 374 | 0.25261163592347974       | 0.0                          | 0.0                          | 2 | 76006 |
| 375 | <b>0.1999258553119373</b> | <b>0.0013240122868340217</b> | <b>0.0013240122868340217</b> | 1 | 75528 |
| 376 | 0.06886505098662428       | 0.0013243279035889286        | 0.0026486558071778573        | 1 | 75510 |
| 377 | 0.48322293408621997       | 0.0013573677923770225        | 0.002714735584754045         | 1 | 73672 |
| 378 | 0.029915285351028678      | 0.004079357093322092         | 0.006798928488870154         | 1 | 73541 |
| 379 | 0.11119500308875009       | 0.0                          | 0.03157388976594139          | 2 | 72845 |
| 380 | 0.04541763580561252       | 0.0                          | 0.0027525839882189406        | 2 | 72659 |
| 381 | 0.057891109579600274      | 0.0027567195037904893        | 0.009648518263266712         | 1 | 72550 |
| 382 | 0.10389106675347341       | 0.004155642670138937         | 0.013852142233796457         | 1 | 72191 |
| 383 | 0.0766668060608595        | 0.03484854820948159          | 0.04042431592299865          | 1 | 71739 |
| 384 | 0.9302981182606245        | 0.0                          | 0.8302205934174361           | 3 | 70945 |
| 385 | 0.0951831554658206        | 0.001442169022209403         | 0.027401211421978655         | 3 | 69340 |
| 386 | 0.0672593285764417        | 0.005848637267516669         | 0.02047023043630834          | 3 | 68392 |
| 387 | 0.4741597829004265        | 0.0014910684996868756        | 0.37724033042077953          | 2 | 67066 |
| 388 | 0.15995030670083082       | 0.012423324792297538         | 0.0031058311980743845        | 2 | 64395 |
| 389 | 0.3347956592011083        | 0.0                          | 0.2836692284856681           | 2 | 60634 |
| 390 | 0.11710794297352342       | 0.006788866259334691         | 0.0050916496945010185        | 2 | 58920 |
| 391 | 0.18485237483953787       | 0.0034231921266581087        | 0.14035087719298245          | 1 | 58425 |
| 392 | 0.17858737387266718       | 0.016072863648540048         | 0.15894276274667382          | 1 | 55995 |
| 393 | 0.2775837676176149        | 0.03044467128709325          | 0.1916223428069987           | 1 | 55839 |
| 394 | 0.1851427698885326        | 0.0                          | 0.16796457474423576          | 2 | 52392 |
| 395 | 0.14772749074305008       | 0.0709859371102968           | 0.005755616522456497         | 2 | 52123 |
| 396 | 0.4196630042809844        | 0.0                          | 0.34585292815116303          | 2 | 47419 |
| 397 | 0.14914849766785987       | 0.0488122356003905           | 0.0                          | 2 | 36876 |
| 398 | 0.3931728131667174        | 0.003047851264858275         | 0.3626943005181347           | 2 | 32810 |
| 399 | 0.03684228154201694       | 0.10382824798204776          | 0.0                          | 2 | 29857 |
| 400 | 0.027060853093393768      | 0.0                          | 0.006765213273348442         | 2 | 29563 |
| 401 | 0.026154047338825683      | 0.0                          | 0.0                          | 2 | 22941 |
| 402 | 0.12234042553191489       | 0.0                          | 0.0425531914893617           | 1 | 18800 |

**Supplementary Table S4. Misincorporation distribution in 376 nt *mboIIM2A356* mRNA pool.**

| base No | A                        | T                    | G                         | C                    |
|---------|--------------------------|----------------------|---------------------------|----------------------|
| 0       | 0.0                      | 0.0                  | 0.0                       | 0.0                  |
| 1       | 0.0                      | 0.0                  | 0.0                       | 0.0                  |
| 2       | 0.12366884232222602      | 0.07901064926142219  | 0.0                       | 0.06870491240123669  |
| 3       | 0.0                      | 0.19210318685465336  | 0.19210318685465336       | 0.3807759596583307   |
| 4       | 0.0                      | 0.06162484165839296  | 0.07189564860145846       | 0.13009688794549623  |
| 5       | 0.36261631089217294      | 0.12999452654625068  | 0.0992063492063492        | 0.0                  |
| 6       | 0.0                      | 0.10940919037199125  | 0.06838074398249452       | 0.18462800875273525  |
| 7       | 0.2597225070056729       | 0.11277424646298954  | 0.07518283097532635       | 0.0                  |
| 8       | 0.4985657697035924       | 0.14342302964075945  | 0.08537085097664254       | 0.0                  |
| 9       | 0.0                      | 0.061412487205731836 | 0.06482429205049471       | 0.18764926646195837  |
| 10      | 0.040919320739275726     | 0.0                  | 0.027279547159517154      | 0.04773920752915502  |
| 11      | 0.0                      | 0.13710998896431797  | 0.0702270675183092        | 0.3444470454469451   |
| 12      | 0.016698951305857992     | 0.0                  | 0.02337853182820119       | 0.02337853182820119  |
| 13      | 0.04659522066165213      | 0.0                  | 0.016641150236304334      | 0.0299540704253478   |
| 14      | 0.026573658860654374     | 0.0                  | 0.03653878093339977       | 0.029895366218236175 |
| 15      | 0.03305348053149997      | 0.0                  | 0.01983208831889998       | 0.02313743637204998  |
| 16      | 0.046229031831990494     | 0.0                  | 0.02641658961828028       | 0.036322810725135386 |
| 17      | 0.06597611664577423      | 0.0                  | 0.032988058322887114      | 0.02639044665830969  |
| 18      | 0.0                      | 0.039555658107261756 | 0.039555658107261756      | 0.09229653558361077  |
| 19      | 0.0                      | 0.11202635914332784  | 0.05930807248764415       | 0.18780889621087316  |
| 20      | 0.0                      | 0.20079660291648835  | 0.08887718489746206       | 0.20408835050528326  |
| 21      | 0.22378727045349833      | 0.30935299150924767  | 0.0                       | 0.08885671032712433  |
| 22      | 0.0                      | 0.20073052749350093  | 0.08226660962848399       | 0.15137056171641053  |
| 23      | 0.27297243965006907      | 0.11510886009340263  | 0.062487666907847135      | 0.0                  |
| 24      | 0.0                      | 0.02300966405890474  | 0.08546446650450332       | 0.05588061271448294  |
| 25      | 0.4286508949314486       | 0.22577795229213704  | 0.0                       | 0.14397434638918882  |
| 26      | 0.3812847356856663       | 0.06785575804575417  | 0.05816207832493214       | 0.0                  |
| 27      | 0.6968416298351454       | 0.20969771268187243  | 0.1419492208923444        | 0.0                  |
| 28      | 0.7440905737836364       | 0.064145739119279    | 0.0                       | 0.0192437217357837   |
| 29      | 0.47777849034823316      | 0.0                  | 0.3847880459180401        | 0.2469056627974091   |
| 30      | 0.0                      | 0.04157339302846178  | 0.3869523504956828        | 0.12791813239526703  |
| 31      | 0.0                      | 0.08951120488475432  | <b>2.2345832933729737</b> | 0.27492727214603113  |
| 32      | 0.09588647041902389      | 0.0                  | 0.06392431361268258       | 0.051139450890146064 |
| 33      | 0.0                      | 0.07661367554108409  | 0.14365064163953264       | 0.12768945923514013  |
| 34      | 0.07659411501882939      | 0.0                  | 0.07021127210059361       | 0.03829705750941469  |
| 35      | 0.8466840829687451       | 0.17940889490415787  | 0.0                       | 0.09757325863208587  |
| 36      | 0.38034667664297295      | 0.102880658436214    | 0.04988153136301285       | 0.0                  |
| 37      | 0.0                      | 0.04973887092762994  | 0.4258890823178314        | 0.1305645361850286   |
| 38      | 0.0                      | 0.040401529042483765 | 0.08080305808496753       | 0.10877334742207168  |
| 39      | 1.023541453428864        | 0.2543345429732329   | 0.0                       | 0.10545578611085266  |
| 40      | 0.0                      | 0.08990296679790433  | 0.3255107418544812        | 0.2170071612363208   |
| 41      | 0.0                      | 0.07736584762022654  | 0.19186730209816177       | 0.15782632914526212  |
| 42      | 0.35236299570364416      | 0.1390906561988069   | 0.0                       | 0.05254535900843817  |
| 43      | <b>1.338319836805341</b> | 0.0                  | 0.3368980651542313        | 0.4636211905792174   |
| 44      | 0.0                      | 0.04633634004695416  | 0.2996416656369702        | 0.0864945014209811   |
| 45      | 0.2277623884272084       | 0.08002462296091105  | 0.043090181594336724      | 0.0                  |
| 46      | 0.4632612363859488       | 0.10124252185918084  | 0.07669888019634913       | 0.0                  |
| 47      | 0.2544991819669151       | 0.060595043325455976 | 0.039386778161546385      | 0.0                  |
| 48      | 0.0                      | 0.021189647343726352 | 0.19676101104888752       | 0.17859845618283637  |
| 49      | 0.0                      | 0.0602627455706882   | 0.0903941183560323        | 0.17777509943353018  |

|     |                      |                      |                      |                      |
|-----|----------------------|----------------------|----------------------|----------------------|
| 50  | 0.036103255310187134 | 0.0                  | 0.018051627655093567 | 0.015043023045911307 |
| 51  | 0.0                  | 0.02700756211739287  | 0.04201176329372224  | 0.08402352658744448  |
| 52  | 0.0                  | 0.16456226437675783  | 0.05385674106875711  | 0.1974747172521094   |
| 53  | 0.04486987735566856  | 0.0                  | 0.05384385282680228  | 0.06580915345498055  |
| 54  | 0.0                  | 0.13955283707948574  | 0.23456753466551855  | 0.18409097657293863  |
| 55  | 0.2908788697278205   | 0.6173755602386394   | 0.0                  | 0.10982161408091182  |
| 56  | 0.24658016790935242  | 0.19961251687899959  | 0.061645041977338104 | 0.0                  |
| 57  | 0.12265280495283708  | 0.30955231726192217  | 0.0                  | 0.06716701223607745  |
| 58  | 0.5640635959784897   | 0.0                  | 0.17827916764086976  | 0.1899696048632219   |
| 59  | 0.0                  | 0.0496335873405156   | 0.10510642025050364  | 0.10218679746576743  |
| 60  | 0.33844897006477215  | 0.07002392484098734  | 0.04084728949057595  | 0.0                  |
| 61  | 0.0                  | 0.07885283724190298  | 0.06425045997488392  | 0.10805759177594113  |
| 62  | 0.08757078638566174  | 0.0                  | 0.0321092883414093   | 0.04086636697997548  |
| 63  | 0.22013671648708147  | 0.05503417912177037  | 0.026068821689259645 | 0.0                  |
| 64  | 0.10713768640509627  | 0.0                  | 0.04053858404517157  | 0.03474735775300419  |
| 65  | 0.09842804620328285  | 0.0                  | 0.043424138030860086 | 0.07237356338476682  |
| 66  | 0.0                  | 0.06657789613848203  | 0.04920974931974759  | 0.18526023273316738  |
| 67  | 0.05785530388498365  | 0.0                  | 0.037605947525239374 | 0.04049871271948856  |
| 68  | 0.06193594054149708  | 0.0                  | 0.029493305019760514 | 0.03539196602371262  |
| 69  | 0.0                  | 0.047200424803823235 | 0.04130037170334533  | 0.09145082305740752  |
| 70  | 0.06491973559962229  | 0.0                  | 0.020656279508970726 | 0.03541076487252125  |
| 71  | 0.062098944317946596 | 0.0                  | 0.026613833279119967 | 0.014785462932844428 |
| 72  | 0.0                  | 0.03844902546508533  | 0.18928750998195853  | 0.09168613764751117  |
| 73  | 0.20927901904144314  | 0.11790367269940459  | 0.020633142722395803 | 0.0                  |
| 74  | 0.062242508669492276 | 0.0                  | 0.05631465070096921  | 0.04149500577966152  |
| 75  | 0.062235130249236874 | 0.0                  | 0.0355629315709925   | 0.02963577630916042  |
| 76  | 0.22795902658535144  | 0.06809165729172835  | 0.041447095742791165 | 0.0                  |
| 77  | 0.32556900583064496  | 0.22197886761180335  | 0.0                  | 0.13910675703673012  |
| 78  | 0.29329857202109383  | 0.07702790780351958  | 0.020738282870178346 | 0.0                  |
| 79  | 0.3554712956928728   | 0.10071686711298064  | 0.041471651164168497 | 0.0                  |
| 80  | 0.0                  | 0.06562658473286996  | 0.06562658473286996  | 0.07457566446917042  |
| 81  | 0.24705322062150256  | 0.0684605310155971   | 0.03571853792118109  | 0.0                  |
| 82  | 0.2828520919269299   | 0.09133765468473777  | 0.01473187978786093  | 0.0                  |
| 83  | 0.06477255998822318  | 0.0                  | 0.023553658177535696 | 0.04121890181068747  |
| 84  | 0.0824426581868504   | 0.0                  | 0.04711009039248594  | 0.04711009039248594  |
| 85  | 0.0                  | 0.03528685270679566  | 0.34992795600905696  | 0.39991766401035084  |
| 86  | 0.03798503973819542  | 0.0                  | 0.01753155680224404  | 0.08181393174380552  |
| 87  | 0.07289904939639587  | 0.0                  | 0.02915961975855835  | 0.1253863649618009   |
| 88  | 0.058326042578011085 | 0.0                  | 0.020414114902303878 | 0.037911927675707204 |
| 89  | 0.04973086824245261  | 0.0                  | 0.020477416335127546 | 0.029253451907325062 |
| 90  | 0.0                  | 0.09467455621301775  | 0.04142011834319527  | 0.10059171597633135  |
| 91  | 0.0                  | 0.04195259356926673  | 0.032962752090138145 | 0.06292889035390009  |
| 92  | 0.050957705104763044 | 0.0                  | 0.026977608584874555 | 0.026977608584874555 |
| 93  | 0.0                  | 0.025421035907213223 | 0.038131553860819824 | 0.03177629488401652  |
| 94  | 0.05081946385465633  | 0.0                  | 0.022233515436412145 | 0.03811459789099225  |
| 95  | 0.057747834456207896 | 0.0                  | 0.03529034327879371  | 0.025665704202759064 |
| 96  | 0.0                  | 0.025462878760321557 | 0.33829253210141497  | 0.13458950201884254  |
| 97  | 0.0                  | 0.04204892966360856  | 0.06498470948012232  | 0.07262996941896024  |
| 98  | 0.12923825452333892  | 0.09502812832598449  | 0.0                  | 0.03421012619735442  |
| 99  | 0.44208322022724633  | 0.1512389963935316   | 0.0                  | 0.07755845968899057  |
| 100 | 0.0                  | 0.05658508982883011  | 0.1084547555052577   | 0.12731645211486775  |
| 101 | 0.12999071494893222  | 0.07428040854224698  | 0.02321262766945218  | 0.0                  |
| 102 | 0.06225035015821964  | 0.0                  | 0.01556258753955491  | 0.020750116719406547 |
| 103 | 0.0                  | 0.021511158913686476 | 0.04302231782737295  | 0.07528905619790266  |

|     |                      |                      |                      |                      |
|-----|----------------------|----------------------|----------------------|----------------------|
| 104 | 0.04294149221685453  | 0.0                  | 0.026838432635534086 | 0.032206119162640906 |
| 105 | 0.09483960948396095  | 0.12831241283124128  | 0.0                  | 0.05020920502092051  |
| 106 | 0.20478980601854485  | 0.08532908584106036  | 0.05119745150463621  | 0.0                  |
| 107 | 0.271985494106981    | 0.14732547597461468  | 0.05099728014505893  | 0.0                  |
| 108 | 0.0                  | 0.08164217401446233  | 0.052484254723582924 | 0.0583158385817588   |
| 109 | 0.0                  | 0.011963153487259242 | 0.04785261394903697  | 0.07177892092355545  |
| 110 | 0.0                  | 0.05638391179050244  | 0.20047613081067536  | 0.15035709810800651  |
| 111 | 0.5318816094111758   | 0.25029722795820036  | 0.0                  | 0.0688317376885051   |
| 112 | 0.0                  | 0.09441681878265248  | 0.07553345502612199  | 0.19512809215081514  |
| 113 | 0.04385140637724738  | 0.0                  | 0.06264486625321056  | 0.08770281275449476  |
| 114 | 0.09995626913225464  | 0.14993440369838196  | 0.0                  | 0.07496720184919098  |
| 115 | 0.16856036958421777  | 0.22474715944562368  | 0.0                  | 0.0998876264202772   |
| 116 | 0.35867102944877927  | 0.0                  | 0.15101938082053865  | 0.25169896803423103  |
| 117 | 0.03778575477045154  | 0.0                  | 0.031488128975376284 | 0.01889287738522577  |
| 118 | 0.0                  | 0.03446136880556896  | 0.06892273761113792  | 0.1516300227445034   |
| 119 | 0.062051847766133476 | 0.0                  | 0.020683949255377827 | 0.020683949255377827 |
| 120 | 0.2663862600771118   | 0.042060988433228176 | 0.056081317910970915 | 0.0                  |
| 121 | 0.0                  | 0.02791152048007815  | 0.4396064475612309   | 0.1256018421603517   |
| 122 | 0.17672648178357803  | 0.11555193039695486  | 0.0                  | 0.10195758564437193  |
| 123 | 0.07475365273530411  | 0.020387359836901122 | 0.027183146449201494 | 0.0                  |
| 124 | 0.048641512056146204 | 0.0                  | 0.03474393718296157  | 0.02779514974636926  |
| 125 | 0.0                  | 0.056211354693648116 | 0.042158516020236084 | 0.10539629005059022  |
| 126 | 0.0                  | 0.06293706293706294  | 0.09090909090909091  | 0.13986013986013987  |
| 127 | 0.0                  | 0.14688396167028048  | 0.08393369238301741  | 0.09092816674826887  |
| 128 | 0.07700385019250962  | 0.0                  | 0.028001400070003502 | 0.014000700035001751 |
| 129 | 0.0                  | 0.04264998578333807  | 0.05686664771111743  | 0.05686664771111743  |
| 130 | 0.3473699135119807   | 0.20558627534382531  | 0.0                  | 0.09924854671770877  |
| 131 | 0.2566844919786096   | 0.1497326203208556   | 0.07130124777183601  | 0.0                  |
| 132 | 0.30709898585916295  | 0.14997857448935867  | 0.0428510212826739   | 0.0                  |
| 133 | 0.0                  | 0.06421691045308599  | 0.0784873349982162   | 0.08562254727078131  |
| 134 | 0.04983270449206237  | 0.0                  | 0.007118957784580338 | 0.02135687335374101  |
| 135 | 0.0                  | 0.02848799943024001  | 0.09970799800584004  | 0.17092799658144006  |
| 136 | 0.24154589371980675  | 0.14919011082693948  | 0.0                  | 0.12077294685990338  |
| 137 | 0.2264044148860903   | 0.02830055186076129  | 0.049525965756332245 | 0.0                  |
| 138 | 0.0                  | 0.04311893639956881  | 0.07905138339920949  | 0.06467840459935321  |
| 139 | 0.0                  | 0.028741826543076814 | 0.09341093626499965  | 0.10778184953653806  |
| 140 | 0.0999714367323622   | 0.0                  | 0.03570408454727221  | 0.057126535275635534 |
| 141 | 0.0                  | 0.02127056154282473  | 0.5601247872943846   | 0.14889393079977312  |
| 142 | 0.0                  | 0.02107037505267594  | 0.24582104228121926  | 0.09130495856159573  |
| 143 | 0.0                  | 0.035280835450183456 | 0.035280835450183456 | 0.04939316963025684  |
| 144 | 0.1545595054095827   | 0.0702543206407194   | 0.0351271603203597   | 0.0                  |
| 145 | 0.0                  | 0.0644791517409371   | 0.07164350193437455  | 0.07880785212781201  |
| 146 | 0.10685282803818208  | 0.04986465308448497  | 0.03561760934606069  | 0.0                  |
| 147 | 0.0                  | 0.037069988137603795 | 0.10379596678529061  | 0.1631079478054567   |
| 148 | 0.49355432780847147  | 0.10313075506445672  | 0.0                  | 0.04419889502762431  |
| 149 | 0.24311183144246357  | 0.0                  | 0.15470752909974952  | 0.1105053779283925   |
| 150 | 0.1418651534383633   | 0.014933174046143508 | 0.014933174046143508 | 0.0                  |
| 151 | 0.0                  | 0.03155071777882947  | 0.10253983278119577  | 0.07887679444707367  |
| 152 | 0.15617679212868968  | 0.046853037638606904 | 0.0                  | 0.031235358425737936 |
| 153 | 0.11684973124561812  | 0.05452987458128846  | 0.015579964166082417 | 0.0                  |
| 154 | 0.0                  | 0.015558148580318941 | 0.14780241151302995  | 0.07001166861143523  |
| 155 | 0.0                  | 0.015561780267662622 | 0.02334267040149393  | 0.1478369125427949   |
| 156 | 0.0                  | 0.05428039702233251  | 0.05428039702233251  | 0.18610421836228289  |
| 157 | 0.02325761686952477  | 0.0                  | 0.031010155826033024 | 0.02325761686952477  |

|     |                      |                      |                      |                      |
|-----|----------------------|----------------------|----------------------|----------------------|
| 158 | 0.06105006105006105  | 0.0                  | 0.022893772893772892 | 0.022893772893772892 |
| 159 | 0.06037735849056604  | 0.09056603773584905  | 0.0                  | 0.022641509433962263 |
| 160 | 0.21092278719397364  | 0.0903954802259887   | 0.0                  | 0.0903954802259887   |
| 161 | 0.21729357110744793  | 0.05994305409860632  | 0.05994305409860632  | 0.0                  |
| 162 | 0.07019733250136495  | 0.015599407222525544 | 0.0                  | 0.046798221667576634 |
| 163 | 0.0                  | 0.06296733569460843  | 0.09445100354191263  | 0.15741833923652104  |
| 164 | 0.0550357732526142   | 0.0                  | 0.0550357732526142   | 0.031449013287208116 |
| 165 | 0.0                  | 0.0316906987799081   | 0.0316906987799081   | 0.04753604816986214  |
| 166 | 0.11860520281489681  | 0.0                  | 0.04744208112595873  | 0.039535067604965606 |
| 167 | 0.08691529709228825  | 0.0                  | 0.05530973451327434  | 0.03160556257901391  |
| 168 | 0.1576416804603137   | 0.07882084023015686  | 0.0                  | 0.023646252069047056 |
| 169 | 0.0                  | 0.05498821681068342  | 0.09426551453260015  | 0.1178318931657502   |
| 170 | 0.0784990972603815   | 0.0                  | 0.0784990972603815   | 0.047099458356228904 |
| 171 | 0.0                  | 0.05502712050939392  | 0.27513560254696956  | 0.20438644760632027  |
| 172 | 0.18001095718869844  | 0.0704390702042733   | 0.0                  | 0.03130625342412147  |
| 173 | 0.1329059494957392   | 0.06254397623328903  | 0.023453991087483386 | 0.0                  |
| 174 | 0.031157501168406293 | 0.0                  | 0.015578750584203147 | 0.031157501168406293 |
| 175 | 0.0                  | 0.047062514707035846 | 0.03137500980469056  | 0.1568750490234528   |
| 176 | 0.015595757953836557 | 0.0                  | 0.015595757953836557 | 0.05458515283842794  |
| 177 | 0.05605381165919283  | 0.016015374759769378 | 0.0                  | 0.032030749519538756 |
| 178 | 0.0                  | 0.08961303462321792  | 0.13034623217922606  | 0.14663951120162932  |
| 179 | 0.0                  | 0.016220600162206    | 0.05677210056772101  | 0.145985401459854    |
| 180 | 0.048634189835454325 | 0.0                  | 0.008105698305909055 | 0.024317094917727163 |
| 181 | 0.0                  | 0.04875274234175672  | 0.18688551231006745  | 0.07312911351263508  |
| 182 | 0.08125457056959454  | 0.0                  | 0.008125457056959454 | 0.04062728528479727  |
| 183 | 0.08932196508323183  | 0.0                  | 0.0243605359317905   | 0.04060089321965083  |
| 184 | 0.0                  | 0.01614074731660076  | 0.14526672584940684  | 0.09684448389960455  |
| 185 | 0.08866677414154442  | 0.0                  | 0.024181847493148476 | 0.04836369498629695  |
| 186 | 0.1411022576361222   | 0.033200531208499334 | 0.033200531208499334 | 0.0                  |
| 187 | 0.09348177105464434  | 0.0                  | 0.025495028469448455 | 0.05099005693889691  |
| 188 | 0.07609706603534286  | 0.05073137735689524  | 0.0                  | 0.01691045911896508  |
| 189 | 0.1860622462787551   | 0.0                  | 0.07611637347767253  | 0.08457374830852503  |
| 190 | 0.07194244604316546  | 0.023980815347721823 | 0.01598721023181455  | 0.0                  |
| 191 | 0.007949757532395262 | 0.0                  | 0.023849272597185785 | 0.015899515064790523 |
| 192 | 0.5199716379106595   | 0.06302686520129205  | 0.0                  | 0.02363507445048452  |
| 193 | 0.0                  | 0.047266425082716244 | 0.16543248778950684  | 0.1575547502757208   |
| 194 | 0.0                  | 0.039394894421682945 | 0.06303183107469272  | 0.13394264103372203  |
| 195 | 0.0                  | 0.007954816641476414 | 0.04772889984885849  | 0.04772889984885849  |
| 196 | 0.039783577339274345 | 0.0                  | 0.039783577339274345 | 0.05569700827498409  |
| 197 | 0.09339248190520663  | 0.07004436142890498  | 0.0                  | 0.0                  |
| 198 | 0.1664948862284944   | 0.0                  | 0.09513993498771109  | 0.05549829540949814  |
| 199 | 0.03095735624177695  | 0.0                  | 0.015478678120888476 | 0.0                  |
| 200 | 0.0                  | 0.02226014691696965  | 0.15582102841878756  | 0.05194034280626253  |
| 201 | 0.0                  | 0.03716366879738368  | 0.059461870075813876 | 0.11892374015162775  |
| 202 | 0.0                  | 0.03727448933949605  | 0.0745489786789921   | 0.2012822424332787   |
| 203 | 0.0                  | 0.0                  | 0.06712410501193317  | 0.08204057279236276  |
| 204 | 0.08024511234315729  | 0.07295010213014298  | 0.0                  | 0.02918004085205719  |
| 205 | 0.5091123736442116   | 0.0                  | 0.25086696672323466  | 0.28038072751420345  |
| 206 | 0.058988349800914316 | 0.0                  | 0.05161480607580003  | 0.06636189352602861  |
| 207 | 0.015081818867355403 | 0.0                  | 0.022622728301033106 | 0.022622728301033106 |
| 208 | 0.2266374556168316   | 0.09065498224673264  | 0.0                  | 0.015109163707788774 |
| 209 | 0.18782870022539444  | 0.1277235161532682   | 0.0                  | 0.05259203606311044  |
| 210 | 0.15351336264042983  | 0.04884516084013677  | 0.020933640360058615 | 0.0                  |
| 211 | 0.0                  | 0.013459855979541017 | 0.15478834376472173  | 0.06056935190793458  |



|     |                      |                      |                      |                      |
|-----|----------------------|----------------------|----------------------|----------------------|
| 212 | 0.0                  | 0.04709681760075355  | 0.08746551840139945  | 0.08073740160129181  |
| 213 | 0.026858255556301617 | 0.060431075001678644 | 0.0                  | 0.033572819445377024 |
| 214 | 0.0                  | 0.04023065575968888  | 0.11398685798578517  | 0.09387153010594072  |
| 215 | 0.0                  | 0.025414575258910985 | 0.06353643814727747  | 0.08895101340618844  |
| 216 | 0.04411672023696981  | 0.0                  | 0.025209554421125605 | 0.012604777210562803 |
| 217 | 0.07023293924850754  | 0.023410979749502514 | 0.0                  | 0.011705489874751257 |
| 218 | 0.3619592503940685   | 0.0                  | 0.1459513106427696   | 0.19265573004845585  |
| 219 | 0.08990678086405149  | 0.07571097335920125  | 0.0                  | 0.02365967917475039  |
| 220 | 0.0                  | 0.046468401486988845 | 0.041821561338289966 | 0.032527881040892194 |
| 221 | 0.0                  | 0.0                  | 0.050484189269815044 | 0.04130524576621231  |
| 222 | 0.13683985460765447  | 0.047038700021381226 | 0.029933718195424414 | 0.0                  |
| 223 | 0.2368265245707519   | 0.1141842172037554   | 0.0                  | 0.03806140573458513  |
| 224 | 0.0                  | 0.025373197445764793 | 0.050746394891529586 | 0.07611959233729437  |
| 225 | 0.11192173768860886  | 0.05388824407229315  | 0.0                  | 0.0082904990880451   |
| 226 | 0.20683378836766775  | 0.0                  | 0.09514354264912717  | 0.14892032762472077  |
| 227 | 0.015767896562598548 | 0.0                  | 0.04730368968779565  | 0.011825922421948912 |
| 228 | 0.015532774153463809 | 0.0                  | 0.015532774153463809 | 0.015532774153463809 |
| 229 | 0.019108767102346557 | 0.0                  | 0.007643506840938622 | 0.026752273943285176 |
| 230 | 0.0                  | 0.04158161336659862  | 0.034021320027217056 | 0.056702200045361764 |
| 231 | 0.0                  | 0.03006614552014432  | 0.08644016837041492  | 0.04134095009019844  |
| 232 | 0.0                  | 0.0188615187294881   | 0.11316911237692859  | 0.08676298615564526  |
| 233 | 0.0                  | 0.025899067633565195 | 0.07769720290069557  | 0.07399733609590055  |
| 234 | 0.07821944108653915  | 0.03199886226267511  | 0.014221716561188936 | 0.0                  |
| 235 | 0.13008798055527027  | 0.06846735818698435  | 0.02054020745609531  | 0.0                  |
| 236 | 0.4419045087550254   | 0.09303252815895272  | 0.0                  | 0.01993554174834701  |
| 237 | 0.0                  | 0.031753087987806815 | 0.09208395516463977  | 0.07620741117073636  |
| 238 | 0.0                  | 0.02968592293534406  | 0.047497476696550495 | 0.06827762275129134  |
| 239 | 0.08653263722634054  | 0.04326631861317027  | 0.031728633649658194 | 0.0                  |
| 240 | 0.07651527572826146  | 0.04918839153959665  | 0.0                  | 0.03825763786413073  |
| 241 | 0.08469641628288603  | 0.06087554920332434  | 0.0                  | 0.023820867079561697 |
| 242 | 0.12400217003797566  | 0.031000542509493915 | 0.02066702833966261  | 0.0                  |
| 243 | 0.0                  | 0.004855901133852915 | 0.09226212154320539  | 0.02670745623619103  |
| 244 | 0.0                  | 0.016658733936220846 | 0.09281294621608757  | 0.02855782960495002  |
| 245 | 0.0                  | 0.017586282699494395 | 0.039569136073862386 | 0.05275884809848319  |
| 246 | 0.0526592943654555   | 0.0                  | 0.02413550991750044  | 0.013164823591363875 |
| 247 | 0.030992135745554563 | 0.0                  | 0.023244101809165925 | 0.011622050904582962 |
| 248 | 0.021017970364661787 | 0.06480540862437384  | 0.0                  | 0.008757487651942411 |
| 249 | 0.036011935384298796 | 0.0703090167026786   | 0.0                  | 0.013718832527351923 |
| 250 | 0.16823745515098454  | 0.0                  | 0.15622049406877134  | 0.11845290209610135  |
| 251 | 0.02864052953156823  | 0.0                  | 0.03341395112016293  | 0.020684826883910386 |
| 252 | 0.0                  | 0.02938540426969924  | 0.02497759362924435  | 0.16749680433728567  |
| 253 | 0.0704018773833969   | 0.0                  | 0.03666764447051921  | 0.016133763567028454 |
| 254 | 0.08963981094148965  | 0.03259629488781442  | 0.014939968490248274 | 0.0                  |
| 255 | 0.0                  | 0.015408914056781848 | 0.015408914056781848 | 0.03595413279915764  |
| 256 | 0.0                  | 0.02035364457448162  | 0.017809439002671415 | 0.03689098079124793  |
| 257 | 0.03937057874750759  | 0.0                  | 0.012700186692744383 | 0.012700186692744383 |
| 258 | 0.0                  | 0.17678630478467683  | 0.049601912853254645 | 0.1106504209803373   |
| 259 | 0.0463595243763391   | 0.021300322010750397 | 0.008770720827956047 | 0.0                  |
| 260 | 0.043838224426658655 | 0.0                  | 0.018787810468567992 | 0.09143401094703091  |
| 261 | 0.06616646483814186  | 0.042446411405600425 | 0.011235814783835408 | 0.0                  |
| 262 | 0.037683097307481914 | 0.03525192973925728  | 0.00972467027289856  | 0.0                  |
| 263 | 0.010874030398956094 | 0.0                  | 0.026580963197448227 | 0.05437015199478047  |
| 264 | 0.018123383998260155 | 0.0                  | 0.021748060797912187 | 0.020539835198028177 |
| 265 | 0.04954982174149496  | 0.0                  | 0.013293854613571817 | 0.019336515801559005 |

|     |                      |                       |                      |                      |
|-----|----------------------|-----------------------|----------------------|----------------------|
| 266 | 0.0                  | 0.02782852787087563   | 0.022988783893332043 | 0.013309295938244866 |
| 267 | 0.0                  | 0.02177753042804946   | 0.016938079221816248 | 0.03508602124519079  |
| 268 | 0.0602889044300287   | 0.0                   | 0.04340801118962066  | 0.022909783683410904 |
| 269 | 0.06046379285815905  | 0.11499976288708684   | 0.0                  | 0.02608242044861763  |
| 270 | 0.04947637503092273  | 0.02002615179823063   | 0.03534026787923052  | 0.0                  |
| 271 | 0.11429237856434776  | 0.032654965304099365  | 0.020992477695492447 | 0.0                  |
| 272 | 0.0                  | 0.018751171948246766  | 0.010547534220888806 | 0.031642602662666414 |
| 273 | 0.0                  | 0.034005229769819775  | 0.03517782389981356  | 0.03517782389981356  |
| 274 | 0.0421896424427803   | 0.0                   | 0.0421896424427803   | 0.0222667557336896   |
| 275 | 0.2192905716718573   | 0.11431104268001073   | 0.0                  | 0.006998635266123106 |
| 276 | 0.030279385561391457 | 0.0                   | 0.04076071133264234  | 0.032608569066113875 |
| 277 | 0.026655540875692465 | 0.0                   | 0.01622511183737802  | 0.01622511183737802  |
| 278 | 0.0                  | 0.04341120694579311   | 0.01485120237619238  | 0.012566402010624322 |
| 279 | 0.0                  | 0.012395064510676656  | 0.007887768324976055 | 0.022536480928503015 |
| 280 | 0.0                  | 0.013473911139556035  | 0.0123510852112597   | 0.0247021704225194   |
| 281 | 0.0                  | 0.010014353907267083  | 0.014465177866052453 | 0.01780329583514148  |
| 282 | 0.0                  | 0.010999406032074268  | 0.07479596101810503  | 0.04069780231867479  |
| 283 | 0.0                  | 0.0076827675523800125 | 0.03951137598366863  | 0.021950764435371462 |
| 284 | 0.0                  | 0.006585879873551106  | 0.07683526519142958  | 0.006585879873551106 |
| 285 | 0.24318639908859874  | 0.0427219349750241    | 0.0                  | 0.018622381912189994 |
| 286 | 0.0                  | 0.020856201975850714  | 0.042810098792535674 | 0.027442371020856202 |
| 287 | 0.09946224806540462  | 0.039347702531368864  | 0.0                  | 0.008743933895859748 |
| 288 | 0.0                  | 0.030568353020808313  | 0.05021943710561366  | 0.029476626127208017 |
| 289 | 0.07415686864561614  | 0.0                   | 0.05481159856415106  | 0.020420007308213143 |
| 290 | 0.06222441557326924  | 0.07724410209095493   | 0.0                  | 0.010728347512632628 |
| 291 | 0.0                  | 0.02362847445976715   | 0.03544271168965073  | 0.03222064699059157  |
| 292 | 0.0                  | 0.023656422718768146  | 0.035484634078152215 | 0.02688229854405471  |
| 293 | 0.10641042177221721  | 0.0                   | 0.05481749000386947  | 0.0386946988262608   |
| 294 | 0.0                  | 0.3797264682220435    | 0.18664521319388577  | 0.2853311879860552   |
| 295 | 0.0696692319235139   | 0.022508521082981413  | 0.009646509035563463 | 0.0                  |
| 296 | 0.09205934616455073  | 0.0256909803249909    | 0.014986405189578025 | 0.0                  |
| 297 | 0.07058672541763812  | 0.018181429274240123  | 0.009625462556950654 | 0.0                  |
| 298 | 0.0                  | 0.020116889717093005  | 0.01694053870913095  | 0.04023377943418601  |
| 299 | 0.08461847644433163  | 0.0                   | 0.035962852488840936 | 0.02221235006663705  |
| 300 | 0.051807445470020405 | 0.0                   | 0.03383343377633986  | 0.012687537666127447 |
| 301 | 0.0                  | 0.029797694935456066  | 0.032990305107112074 | 0.03724711866932008  |
| 302 | 0.0414871549385671   | 0.0                   | 0.020211690867507046 | 0.02446678368171906  |
| 303 | 0.0                  | 0.22686314004028413   | 0.09010919113749602  | 0.22156259938513728  |
| 304 | 0.03496170104567269  | 0.024367246183347638  | 0.006356672917395036 | 0.0                  |
| 305 | 0.0728447456768227   | 0.02639302379595025   | 0.011612930470218111 | 0.0                  |
| 306 | 0.0                  | 0.012701907403095031  | 0.06774350614984016  | 0.035988737642102586 |
| 307 | 0.3109992172128546   | 0.0740474326697273    | 0.0                  | 0.015867307000655848 |
| 308 | 0.0                  | 0.10154754223214192   | 0.08462295186011826  | 0.09943196843563895  |
| 309 | 0.08037310039234763  | 0.01692065271417845   | 0.011632948740997684 | 0.0                  |
| 310 | 0.0                  | 0.028606543481946092  | 0.0794626207831836   | 0.06462959823698931  |
| 311 | 0.06992488372339412  | 0.0                   | 0.02224882663926176  | 0.015892019028044116 |
| 312 | 0.0                  | 0.02332806684551518   | 0.04453540034143807  | 0.07210493388613783  |
| 313 | 0.057254943540264    | 0.0                   | 0.028627471770132    | 0.01696442771563378  |
| 314 | 0.021178364183150493 | 0.0                   | 0.028590791647253165 | 0.011648100300732772 |
| 315 | 0.01482673896467     | 0.0                   | 0.046598322460391424 | 0.022240108447004997 |
| 316 | 0.019082755549901406 | 0.0                   | 0.03392489875538028  | 0.015902296291584506 |
| 317 | 0.018027189243070136 | 0.0                   | 0.024389726622977243 | 0.013785497656465398 |
| 318 | 0.05198001421494266  | 0.08380451271388716   | 0.0                  | 0.009547349549683346 |
| 319 | 0.0                  | 0.019109903176490573  | 0.0552063869543061   | 0.028664854764735858 |

|     |                      |                       |                      |                      |
|-----|----------------------|-----------------------|----------------------|----------------------|
| 320 | 0.046708137831468544 | 0.0                   | 0.03609265196068024  | 0.02123097174157661  |
| 321 | 0.021234352936180152 | 0.0                   | 0.020172635289371146 | 0.014864047055326105 |
| 322 | 0.04991238782987309  | 0.0                   | 0.013805554080603197 | 0.011681622683587321 |
| 323 | 0.0                  | 0.02338037748682197   | 0.012752933174630166 | 0.012752933174630166 |
| 324 | 0.0                  | 0.012761748784975168  | 0.030840892897023325 | 0.014888706915804363 |
| 325 | 0.0                  | 0.021283161826520947  | 0.23411478009173042  | 0.026603952283151183 |
| 326 | 0.08619772267745025  | 0.0                   | 0.036181760136213686 | 0.01596254123656486  |
| 327 | 0.0                  | 0.0319723758672507    | 0.14067845381590308  | 0.03303812172949239  |
| 328 | 0.14704002045774198  | 0.060733921493415166  | 0.0                  | 0.024506670076290326 |
| 329 | 0.044737963357477636 | 0.031955688112484025  | 0.034086067319982954 | 0.0                  |
| 330 | 0.13855729877216916  | 0.06714699863574353   | 0.0                  | 0.03090893587994543  |
| 331 | 0.0                  | 0.10134414337529336   | 0.09067633880947301  | 0.08427565606998079  |
| 332 | 0.0810770445283663   | 0.018135654697134566  | 0.009601228957306536 | 0.0                  |
| 333 | 0.0                  | 0.023475931834430655  | 0.11204422011887358  | 0.04695186366886131  |
| 334 | 0.06402526863935633  | 0.0                   | 0.04161642461558162  | 0.020274668402462837 |
| 335 | 0.024575800316279865 | 0.0                   | 0.021370261144591188 | 0.04380903534641193  |
| 336 | 0.05556564760693716  | 0.019234262633170553  | 0.004274280585149013 | 0.0                  |
| 337 | 0.0                  | 0.012833538313459174  | 0.07486230682851185  | 0.05775092241056628  |
| 338 | 0.0                  | 0.035347800938323445  | 0.028920928040446454 | 0.035347800938323445 |
| 339 | 0.05677192681777282  | 0.014996358027336218  | 0.004284673722096063 | 0.0                  |
| 340 | 0.0                  | 0.011882642699736422  | 0.016203603681458758 | 0.03348744760834809  |
| 341 | 0.0                  | 0.012976059170829819  | 0.033521486191310366 | 0.019464088756244727 |
| 342 | 0.0                  | 0.2425922717033443    | 0.12887714434240166  | 0.23717726563853753  |
| 343 | 0.050903262140969546 | 0.014079625698566045  | 0.00974743317593034  | 0.0                  |
| 344 | 0.06068092668443751  | 0.020588171553648442  | 0.005417939882539063 | 0.0                  |
| 345 | 0.0                  | 0.030346053387378207  | 0.01734060193564469  | 0.03793256673422276  |
| 346 | 0.0281781727538745   | 0.0                   | 0.03468082800476861  | 0.009753982876341173 |
| 347 | 0.019511349101393977 | 0.0                   | 0.02059531294036031  | 0.013007566067595986 |
| 348 | 0.013062930668495478 | 0.0                   | 0.017417240891327304 | 0.01850581844703526  |
| 349 | 0.06326490542987413  | 0.0                   | 0.015270839241693753 | 0.013089290778594647 |
| 350 | 0.0                  | 0.013242840589306406  | 0.011035700491088672 | 0.012139270540197538 |
| 351 | 0.0                  | 0.011042037034992217  | 0.015458851848989102 | 0.016563055552488323 |
| 352 | 0.0                  | 0.007734208403769874  | 0.013258642977891213 | 0.012153756063066946 |
| 353 | 0.0                  | 0.009956853634251576  | 0.03429582918464432  | 0.030976877973227124 |
| 354 | 0.0                  | 0.0433516373579956    | 0.14784019919521577  | 0.08003379204553034  |
| 355 | 0.07132985600285319  | 0.023405109000936203  | 0.004458116000178324 | 0.0                  |
| 356 | 0.0                  | 0.3233503556853912    | 0.28098030907834     | 0.3400753740829115   |
| 357 | 0.02676122298789055  | 0.013380611493945274  | 0.005575254789143864 | 0.0                  |
| 358 | 0.03795278227381816  | 0.010046324719540102  | 0.005581291510855612 | 0.0                  |
| 359 | 0.0                  | 0.0022400430088257693 | 0.024640473097083462 | 0.030240580619147885 |
| 360 | 0.0                  | 0.007926622126599479  | 0.0498244819386253   | 0.020382742611255805 |
| 361 | 0.0                  | 0.25741198446416164   | 0.18679453739877216  | 0.23918812715696436  |
| 362 | 0.029614780053306602 | 0.02619769004715584   | 0.006834180012301523 | 0.0                  |
| 363 | 0.0160082328054428   | 0.0                   | 0.10977073923732206  | 0.08232805442799154  |
| 364 | 0.013727621117657152 | 0.0                   | 0.07550191614711434  | 0.02287936852942859  |
| 365 | 0.013744444953497961 | 0.0                   | 0.03894259403491089  | 0.009162963302331975 |
| 366 | 0.00462155261059953  | 0.0                   | 0.024263151205647537 | 0.01733082228974824  |
| 367 | 0.003490970024204059 | 0.0                   | 0.019782163470489667 | 0.008145596723142804 |
| 368 | 0.00591589957168887  | 0.0                   | 0.010648619229039967 | 0.00591589957168887  |
| 369 | 0.013550970126270405 | 0.0                   | 0.004927625500461965 | 0.016014782876501387 |
| 370 | 0.0                  | 0.017971989370852003  | 0.023106843476809715 | 0.008985994685426001 |
| 371 | 0.0                  | 0.025792473756157955  | 0.025792473756157955 | 0.009027365814655283 |
| 372 | 0.014189337357945383 | 0.0                   | 0.021928975916824685 | 0.02063903615701147  |
| 373 | 0.06688436872959043  | 0.041966662732292034  | 0.0                  | 0.003934374631152379 |

|     |                      |                       |                       |                       |
|-----|----------------------|-----------------------|-----------------------|-----------------------|
| 374 | 0.18682735573507353  | 0.05657448096202931   | 0.0                   | 0.009209799226376865  |
| 375 | 0.0                  | 0.05296049147336088   | 0.06884863891536913   | 0.07679271263637327   |
| 376 | 0.055621771950735    | 0.007945967421533572  | 0.0026486558071778573 | 0.0                   |
| 377 | 0.0                  | 0.16424150287761974   | 0.12487783689868606   | 0.19138885872516015   |
| 378 | 0.010878285582192245 | 0.010878285582192245  | 0.0013597856977740307 | 0.0                   |
| 379 | 0.020591667238657425 | 0.0                   | 0.03981055666140435   | 0.01921888942274693   |
| 380 | 0.013762919941094702 | 0.0                   | 0.019268087917532584  | 0.009634043958766292  |
| 381 | 0.0                  | 0.011026878015161957  | 0.02756719503790489   | 0.009648518263266712  |
| 382 | 0.026319070244213268 | 0.0                   | 0.04155642670138937   | 0.02216342757407433   |
| 383 | 0.0153333612121719   | 0.01951518699730969   | 0.0013939419283792638 | 0.0                   |
| 384 | 0.016914511241102263 | 0.0                   | 0.053562618930157166  | 0.02960039467192896   |
| 385 | 0.007210845111047014 | 0.0                   | 0.0475915777329103    | 0.012979521199884625  |
| 386 | 0.01023511521815417  | 0.0                   | 0.019008071119429173  | 0.017545911802550006  |
| 387 | 0.03280350699311126  | 0.052187397489040645  | 0.0                   | 0.011928547997495004  |
| 388 | 0.09472785154126873  | 0.051246214768227355  | 0.0                   | 0.010870409193260346  |
| 389 | 0.0                  | 0.013193917603984561  | 0.029686314608965265  | 0.008246198502490351  |
| 390 | 0.0                  | 0.013577732518669382  | 0.07807196198234895   | 0.020366598778004074  |
| 391 | 0.02396234488660676  | 0.0                   | 0.01198117244330338   | 0.00855798031664527   |
| 392 | 0.0                  | 0.0053576212161800165 | 0.010715242432360033  | 0.003571747477453344  |
| 393 | 0.05730761654041082  | 0.02149035620265406   | 0.0                   | 0.007163452067551352  |
| 394 | 0.0                  | 0.007634753397465261  | 0.0057260650480989465 | 0.0038173766987326307 |
| 395 | 0.0                  | 0.047963471020470806  | 0.04412639333883314   | 0.04988200986128965   |
| 396 | 0.05272148294987242  | 0.014762015225964275  | 0.00632657795398469   | 0.0                   |
| 397 | 0.14372491593448314  | 0.005423581733376722  | 0.0                   | 0.0                   |
| 398 | 0.0                  | 0.009143553794574825  | 0.009143553794574825  | 0.0121914050594331    |
| 399 | 0.0                  | 0.006698596644003081  | 0.006698596644003081  | 0.023445088254010784  |
| 400 | 0.013530426546696884 | 0.0                   | 0.003382606636674221  | 0.003382606636674221  |
| 401 | 0.0                  | 0.0                   | 0.013077023669412841  | 0.013077023669412841  |
| 402 | 0.06382978723404255  | 0.010638297872340425  | 0.005319148936170213  | 0.0                   |
| 403 | 0.0                  | 0.0                   | 0.0188821752265861    | 0.0062940584088620345 |

## SUPPLEMENTARY REFERENCES

3. Tabor,S. and Richardson,C. (1985) A bacteriophage T7 RNA polymerase/promoter system for controlled exclusive expression of specific genes. *Proc. Natl. Acad. Sci. U.S.A.*, **82**, 1074–1078.
29. Bocklage,H., Heeger,K. and Muller-Hill,B. (1991) Cloning and characterization of the MboII restriction-modification system. *Nucleic Acids Res.*, **19**, 1007-1013.
30. Furmanek-Blaszczak,B., Boratynski,R., Zolcinska,N. and Sektas,M. (2009) M1.MboII and M2.MboII type IIS methyltransferases: different specificities, the same target. *Microbiology*, **155**, 111-1121.
32. Furmanek,B., Sektas,M., Wons,E. and Kaczorowski,T. (2007) Molecular characterization of the DNA methyltransferase M1.NcuI from *Neisseria cuniculi* ATCC 14688. *Res. Microbiol.*, **158**, 164-174.
33. Mruk,I. and Blumenthal,R.M. (2009) Tuning the relative affinities for activating and repressing operators of a temporally regulated restriction-modification system. *Nucleic Acids Res.*, **37**, 983-998.
35. Miller,W.G. and Lindow,S.E. (1997) An improved GFP cloning cassette designed for prokaryotic transcriptional fusions. *Gene*, **191**, 149–153.
79. Roepstorff,P. and Fohlman, J. (1984). Proposal for a common nomenclature for sequence ions in mass spectra of peptides. *Biomed. Mass Spectrom.*, **11**, 601.
80. Posfai,G., Koob,M., Hradecna,Z., Hasan,N., Filutowicz,M. and Szybalski,W. (1994) *In vivo* excision and amplification of large segments of the *Escherichia coli* genome. *Nucleic Acids Res.*, **22**, 2392-2398.
81. Guzman,L.M., Belin,D., Carson,M.J. and Beckwith,J. (1995) Tight regulation, modulation, and high-level expression by vectors containing the arabinose P<sub>BAD</sub> promoter. *J. Bacteriol.*, **177**, 4121-4130.
82. Bolivar,F., Rodriguez,R.L., Greene,P.J., Betlach,M.C., Heyneker,H.L., Boyer,H.W., Crosa,J.H. and Falkow S. (1977) Construction and characterization of new cloning vehicles, II: a multipurpose cloning system. *Gene*, **2**, 95-113.

83. Hasan,N., Koob,M. and Szybalski,W. (1994) *Escherichia coli* genome targeting. I. Cre-lox-mediated in vitro generation of ori- plasmids and their in vivo chromosomal integration and retrieval. *Gene*, **150**, 51-56.
84. Cohen,S.N., Chang,A.C.Y., Boyer,H.W. and Helling,R.B. (1973) Construction of biologically functional bacterial plasmids in vitro. *Proc. Natl. Acad. Sci. U.S.A.*, **70**, 3240-3244.
85. Yanish-Perron,C., Vieira,C. and Messing,J. (1985) Improved M13 phage cloning vectors and host strains: nucleotide sequences of the M13mp18 and pUC19 vectors. *Gene*, **33**, 103-119.
